# Supplementary material for: Research on RMB Exchange Rate Volatility Risk Based on MSGARCH-VaR Model
Source: Hindawi journal article supplement (doi:10.1155/2020/8719574), 2020-08-01
Supplement: f1 [file 8719574.f1.xlsx]

## Sheet: raw data
	USD	HKD	JPY
2010-06-21	6.8275	0.87856	0.0755
2010-06-22	6.798	0.87443	0.07474
2010-06-23	6.8102	0.87525	0.075243
2010-06-24	6.81	0.87557	0.075742
2010-06-25	6.7896	0.87286	0.075697
2010-06-28	6.789	0.87276	0.075986
2010-06-29	6.7901	0.87247	0.075948
2010-06-30	6.7909	0.87239	0.076686
2010-07-01	6.7858	0.87139	0.07678
2010-07-02	6.772	0.86938	0.077169
2010-07-05	6.7733	0.8689	0.077039
2010-07-06	6.779	0.87016	0.077532
2010-07-07	6.7781	0.87007	0.077367
2010-07-08	6.7768	0.8702	0.077
2010-07-09	6.7753	0.87008	0.076518
2010-07-12	6.7718	0.87151	0.0761
2010-07-13	6.7802	0.87202	0.076384
2010-07-14	6.7755	0.87138	0.076159
2010-07-15	6.7741	0.87167	0.076782
2010-07-16	6.7718	0.8715	0.077458
2010-07-19	6.78	0.87193	0.078277
2010-07-20	6.7812	0.87211	0.078017
2010-07-21	6.7802	0.87163	0.077683
2010-07-22	6.7859	0.87267	0.078219
2010-07-23	6.779	0.87195	0.077861
2010-07-26	6.7778	0.87256	0.07735
2010-07-27	6.7742	0.87222	0.077914
2010-07-28	6.7785	0.87266	0.077279
2010-07-29	6.7787	0.87274	0.077591
2010-07-30	6.775	0.87236	0.078256
2010-08-02	6.7742	0.87232	0.078161
2010-08-03	6.7722	0.87221	0.078246
2010-08-04	6.7715	0.87248	0.079069
2010-08-05	6.7783	0.87286	0.078516
2010-08-06	6.773	0.87244	0.078861
2010-08-09	6.7685	0.87191	0.079233
2010-08-10	6.7745	0.87276	0.078732
2010-08-11	6.7768	0.87282	0.079382
2010-08-12	6.8015	0.87575	0.079872
2010-08-13	6.8035	0.87581	0.079064
2010-08-16	6.8064	0.87558	0.079278
2010-08-17	6.7979	0.87458	0.079736
2010-08-18	6.7895	0.87367	0.079419
2010-08-19	6.7898	0.87387	0.079292
2010-08-20	6.7884	0.87354	0.079545
2010-08-23	6.7989	0.8745	0.07945
2010-08-24	6.7999	0.87458	0.079881
2010-08-25	6.8007	0.87448	0.080606
2010-08-26	6.8041	0.87493	0.080355
2010-08-27	6.8001	0.8743	0.080589
2010-08-30	6.8025	0.87447	0.079362
2010-08-31	6.8105	0.87528	0.080545
2010-09-01	6.8126	0.87574	0.080847
2010-09-02	6.8003	0.87451	0.080596
2010-09-03	6.7973	0.87441	0.080584
2010-09-06	6.7838	0.873	0.080334
2010-09-07	6.7799	0.87285	0.080545
2010-09-08	6.7907	0.87385	0.080972
2010-09-09	6.7817	0.87273	0.080759
2010-09-10	6.7625	0.8704	0.080425
2010-09-13	6.7509	0.86915	0.080153
2010-09-14	6.7378	0.86735	0.080833
2010-09-15	6.725	0.86594	0.080941
2010-09-16	6.7181	0.86493	0.078496
2010-09-17	6.7172	0.86492	0.078348
2010-09-20	6.711	0.86421	0.078276
2010-09-21	6.6997	0.8629	0.078204
2010-09-27	6.7098	0.86497	0.07959
2010-09-28	6.7051	0.86421	0.079524
2010-09-29	6.6936	0.86284	0.0797
2010-09-30	6.7011	0.86349	0.079999
2010-10-08	6.683	0.86165	0.08104
2010-10-11	6.6732	0.86029	0.081276
2010-10-12	6.6775	0.86055	0.08124
2010-10-13	6.6693	0.85957	0.081477
2010-10-14	6.6582	0.85799	0.081611
2010-10-15	6.6497	0.85701	0.081531
2010-10-18	6.6541	0.85763	0.081801
2010-10-19	6.6553	0.85792	0.081957
2010-10-20	6.6754	0.86022	0.082022
2010-10-21	6.6695	0.85896	0.082243
2010-10-22	6.6759	0.85984	0.082185
2010-10-25	6.6729	0.85962	0.082214
2010-10-26	6.6762	0.86055	0.082693
2010-10-27	6.6912	0.86228	0.082111
2010-10-28	6.6986	0.86341	0.082101
2010-10-29	6.6908	0.86256	0.082648
2010-11-01	6.6886	0.86277	0.082995
2010-11-02	6.6925	0.86329	0.083008
2010-11-03	6.6818	0.86197	0.082865
2010-11-04	6.6708	0.86063	0.082148
2010-11-05	6.661	0.85937	0.08226
2010-11-08	6.6692	0.86041	0.082138
2010-11-09	6.658	0.85891	0.081985
2010-11-10	6.645	0.85719	0.081319
2010-11-11	6.6242	0.85456	0.080542
2010-11-12	6.6239	0.85451	0.080402
2010-11-15	6.6303	0.85536	0.080362
2010-11-16	6.6441	0.85701	0.07991
2010-11-17	6.649	0.85727	0.079715
2010-11-18	6.6455	0.85688	0.079888
2010-11-19	6.6408	0.85646	0.079478
2010-11-22	6.6389	0.85615	0.079484
2010-11-23	6.6469	0.85692	0.079761
2010-11-24	6.6589	0.85829	0.0799
2010-11-25	6.6557	0.85788	0.079747
2010-11-26	6.6553	0.85765	0.079481
2010-11-29	6.67	0.85907	0.079277
2010-11-30	6.6762	0.85979	0.07929
2010-12-01	6.6786	0.85993	0.079864
2010-12-02	6.6691	0.85868	0.079248
2010-12-03	6.6605	0.85751	0.079543
2010-12-06	6.6515	0.8567	0.080279
2010-12-07	6.6565	0.85754	0.080587
2010-12-08	6.6616	0.85792	0.079708
2010-12-09	6.6654	0.85807	0.079421
2010-12-10	6.6604	0.85711	0.079465
2010-12-13	6.663	0.85683	0.079402
2010-12-14	6.6531	0.85537	0.079635
2010-12-15	6.6566	0.85619	0.079382
2010-12-16	6.6635	0.85692	0.079092
2010-12-17	6.6593	0.85634	0.079273
2010-12-20	6.6623	0.8566	0.079214
2010-12-21	6.6597	0.8563	0.079514
2010-12-22	6.6548	0.85599	0.079408
2010-12-23	6.6466	0.85447	0.079543
2010-12-24	6.6371	0.85329	0.079854
2010-12-27	6.6305	0.85213	0.079939
2010-12-28	6.6252	0.85144	0.080126
2010-12-29	6.6247	0.85134	0.080451
2010-12-30	6.6229	0.85103	0.081397
2010-12-31	6.6227	0.85093	0.08126
2011-01-04	6.6215	0.85213	0.080977
2011-01-05	6.6295	0.85332	0.080852
2011-01-06	6.6322	0.85338	0.079642
2011-01-07	6.6341	0.85336	0.079617
2011-01-10	6.6349	0.85353	0.079977
2011-01-11	6.6216	0.85149	0.079889
2011-01-12	6.6128	0.8504	0.07939
2011-01-13	6.5997	0.84907	0.079438
2011-01-14	6.5896	0.84754	0.079618
2011-01-17	6.5897	0.84757	0.079442
2011-01-18	6.5891	0.84733	0.079646
2011-01-19	6.5885	0.84713	0.079696
2011-01-20	6.5883	0.84699	0.080155
2011-01-21	6.5886	0.84636	0.079424
2011-01-24	6.5883	0.84566	0.07967
2011-01-25	6.5881	0.84506	0.079735
2011-01-26	6.5878	0.84563	0.0801
2011-01-27	6.5876	0.84636	0.080239
2011-01-28	6.593	0.84647	0.079621
2011-01-31	6.5891	0.8456	0.080223
2011-02-01	6.586	0.84482	0.080214
2011-02-09	6.585	0.84594	0.080036
2011-02-10	6.5849	0.8457	0.079841
2011-02-11	6.5952	0.84666	0.079198
2011-02-14	6.5985	0.84663	0.079247
2011-02-15	6.5929	0.84591	0.079127
2011-02-16	6.5855	0.84498	0.078661
2011-02-17	6.58	0.84487	0.078685
2011-02-18	6.5781	0.84473	0.078936
2011-02-21	6.5705	0.8441	0.079034
2011-02-22	6.5772	0.84475	0.079349
2011-02-23	6.5828	0.8448	0.079421
2011-02-24	6.5795	0.84406	0.07994
2011-02-25	6.5757	0.84364	0.080255
2011-02-28	6.5752	0.84363	0.08046
2011-03-01	6.5706	0.84366	0.080222
2011-03-02	6.5736	0.84372	0.080278
2011-03-03	6.5695	0.84318	0.080292
2011-03-04	6.5671	0.84321	0.079741
2011-03-07	6.5651	0.84298	0.079707
2011-03-08	6.5687	0.84348	0.079838
2011-03-09	6.5748	0.84402	0.079334
2011-03-10	6.5713	0.84377	0.079368
2011-03-11	6.575	0.84405	0.079289
2011-03-14	6.5701	0.84341	0.080128
2011-03-15	6.5679	0.84295	0.080238
2011-03-16	6.5718	0.84313	0.081018
2011-03-17	6.569	0.84189	0.082743
2011-03-18	6.5668	0.84174	0.080972
2011-03-21	6.5632	0.8415	0.081077
2011-03-22	6.5592	0.84123	0.081003
2011-03-23	6.5601	0.84154	0.080934
2011-03-24	6.5625	0.84197	0.081059
2011-03-25	6.558	0.84129	0.080968
2011-03-28	6.5618	0.84176	0.080419
2011-03-29	6.5625	0.84149	0.080447
2011-03-30	6.5586	0.84153	0.079537
2011-03-31	6.5564	0.84225	0.078883
2011-04-01	6.5527	0.84237	0.078532
2011-04-06	6.5496	0.84267	0.076959
2011-04-07	6.5456	0.8419	0.076619
2011-04-08	6.542	0.8418	0.076852
2011-04-11	6.5401	0.84184	0.076929
2011-04-12	6.544	0.84191	0.077595
2011-04-13	6.5369	0.84081	0.077718
2011-04-14	6.5339	0.84019	0.078073
2011-04-15	6.5301	0.83985	0.078079
2011-04-18	6.531	0.83994	0.078597
2011-04-19	6.5346	0.83984	0.079097
2011-04-20	6.5294	0.83957	0.078829
2011-04-21	6.5228	0.83936	0.0793
2011-04-22	6.5156	0.83881	0.079677
2011-04-25	6.5161	0.8386	0.079291
2011-04-26	6.5173	0.83856	0.079747
2011-04-27	6.5096	0.83758	0.079809
2011-04-28	6.5051	0.83725	0.079311
2011-04-29	6.499	0.83639	0.079718
2011-05-03	6.5002	0.83677	0.080175
2011-05-04	6.5013	0.83697	0.080288
2011-05-05	6.5025	0.83671	0.080681
2011-05-06	6.5003	0.8363	0.080744
2011-05-09	6.4988	0.83626	0.08052
2011-05-10	6.495	0.83563	0.080919
2011-05-11	6.4948	0.83571	0.080381
2011-05-12	6.5005	0.83631	0.080199
2011-05-13	6.5017	0.8365	0.080372
2011-05-16	6.5089	0.83738	0.080496
2011-05-17	6.5108	0.83718	0.080395
2011-05-18	6.5074	0.83702	0.079978
2011-05-19	6.5048	0.83671	0.079672
2011-05-20	6.4983	0.83593	0.079514
2011-05-23	6.4998	0.83605	0.079416
2011-05-24	6.5038	0.8362	0.079436
2011-05-25	6.4949	0.83511	0.079076
2011-05-26	6.4921	0.83413	0.079215
2011-05-27	6.4898	0.83381	0.079899
2011-05-30	6.4856	0.83353	0.080168
2011-05-31	6.4845	0.83368	0.080214
2011-06-01	6.4837	0.8337	0.079662
2011-06-02	6.4886	0.83398	0.080022
2011-06-03	6.4846	0.83373	0.080205
2011-06-07	6.4816	0.83319	0.080808
2011-06-08	6.4795	0.83291	0.080822
2011-06-09	6.483	0.83308	0.081048
2011-06-10	6.4853	0.83336	0.080688
2011-06-13	6.4892	0.83373	0.080686
2011-06-14	6.4822	0.83268	0.080871
2011-06-15	6.4796	0.83244	0.080427
2011-06-16	6.4803	0.83179	0.080117
2011-06-17	6.4716	0.82942	0.080278
2011-06-20	6.4696	0.83014	0.080663
2011-06-21	6.469	0.83024	0.080686
2011-06-22	6.4683	0.83046	0.080567
2011-06-23	6.4736	0.83113	0.080467
2011-06-24	6.4742	0.83111	0.0804
2011-06-27	6.475	0.83116	0.080151
2011-06-28	6.4723	0.8311	0.080147
2011-06-29	6.4718	0.83133	0.079933
2011-06-30	6.4716	0.83162	0.080243
2011-07-01	6.4685	0.83105	0.080056
2011-07-04	6.4661	0.83099	0.080011
2011-07-05	6.465	0.83099	0.079958
2011-07-06	6.4715	0.83167	0.079959
2011-07-07	6.4732	0.8317	0.079931
2011-07-08	6.4705	0.83138	0.079603
2011-07-11	6.4709	0.83145	0.08014
2011-07-12	6.4748	0.83126	0.080738
2011-07-13	6.4728	0.83062	0.08145
2011-07-14	6.464	0.82991	0.082093
2011-07-15	6.4665	0.83	0.081782
2011-07-18	6.468	0.82974	0.081863
2011-07-19	6.4684	0.82974	0.081868
2011-07-20	6.4592	0.82888	0.081437
2011-07-21	6.4536	0.82827	0.081924
2011-07-22	6.4495	0.82767	0.082081
2011-07-25	6.4503	0.82788	0.08229
2011-07-26	6.447	0.82739	0.082342
2011-07-27	6.4426	0.82709	0.082666
2011-07-28	6.4438	0.82694	0.082703
2011-07-29	6.4442	0.82696	0.082846
2011-08-01	6.4399	0.82642	0.082685
2011-08-02	6.4419	0.82681	0.083342
2011-08-03	6.4441	0.82656	0.083403
2011-08-04	6.4386	0.82572	0.083493
2011-08-05	6.4451	0.82608	0.081568
2011-08-08	6.4305	0.82385	0.082295
2011-08-09	6.4335	0.82377	0.083061
2011-08-10	6.4167	0.82209	0.083236
2011-08-11	6.3991	0.81939	0.083132
2011-08-12	6.3972	0.82074	0.083086
2011-08-15	6.395	0.8205	0.083074
2011-08-16	6.3925	0.82054	0.083187
2011-08-17	6.3996	0.8213	0.083361
2011-08-18	6.3942	0.82068	0.083421
2011-08-19	6.4032	0.82113	0.083283
2011-08-22	6.3997	0.82062	0.083378
2011-08-23	6.3987	0.82037	0.083289
2011-08-24	6.3896	0.81953	0.083149
2011-08-25	6.3936	0.82015	0.083093
2011-08-26	6.395	0.8203	0.082644
2011-08-29	6.3883	0.8195	0.083219
2011-08-30	6.3849	0.8193	0.083029
2011-08-31	6.3867	0.81923	0.083296
2011-09-01	6.3859	0.81995	0.083031
2011-09-02	6.3896	0.82066	0.083025
2011-09-05	6.3926	0.82041	0.083194
2011-09-06	6.3946	0.82057	0.083117
2011-09-07	6.3968	0.82069	0.082529
2011-09-08	6.3889	0.81971	0.082539
2011-09-09	6.3922	0.8201	0.082411
2011-09-13	6.3982	0.82013	0.082927
2011-09-14	6.3945	0.81952	0.083126
2011-09-15	6.3878	0.81926	0.083245
2011-09-16	6.3797	0.81868	0.083064
2011-09-19	6.3848	0.81924	0.082968
2011-09-20	6.388	0.81929	0.08328
2011-09-21	6.3772	0.81861	0.083542
2011-09-22	6.3808	0.8186	0.083197
2011-09-23	6.384	0.81853	0.08373
2011-09-26	6.3735	0.81697	0.08327
2011-09-27	6.376	0.81767	0.083505
2011-09-28	6.3623	0.8161	0.083151
2011-09-29	6.3665	0.81662	0.083271
2011-09-30	6.3549	0.81539	0.082978
2011-10-10	6.3586	0.81708	0.082778
2011-10-11	6.3483	0.81586	0.082725
2011-10-12	6.3598	0.8173	0.082896
2011-10-13	6.3737	0.81935	0.082609
2011-10-14	6.3762	0.81983	0.082862
2011-10-17	6.371	0.81913	0.08243
2011-10-18	6.3749	0.81965	0.082953
2011-10-19	6.3727	0.81947	0.083091
2011-10-20	6.3652	0.81845	0.082853
2011-10-21	6.3628	0.81781	0.082784
2011-10-24	6.3549	0.8168	0.08325
2011-10-25	6.3425	0.81553	0.083262
2011-10-26	6.3456	0.81611	0.083385
2011-10-27	6.3477	0.81662	0.083243
2011-10-28	6.329	0.81476	0.083337
2011-10-31	6.3233	0.81441	0.08352
2011-11-01	6.3293	0.81478	0.080695
2011-11-02	6.3297	0.8145	0.08086
2011-11-03	6.3198	0.81327	0.080945
2011-11-04	6.3165	0.81312	0.080965
2011-11-07	6.3212	0.8137	0.080911
2011-11-08	6.3247	0.81402	0.081013
2011-11-09	6.3207	0.81354	0.081337
2011-11-10	6.3329	0.81448	0.081332
2011-11-11	6.3317	0.81378	0.08161
2011-11-14	6.3301	0.81372	0.08198
2011-11-15	6.3436	0.8151	0.082262
2011-11-16	6.3509	0.81601	0.082388
2011-11-17	6.3553	0.81639	0.082499
2011-11-18	6.3548	0.81596	0.082551
2011-11-21	6.3522	0.81554	0.082598
2011-11-22	6.3555	0.81588	0.082582
2011-11-23	6.3498	0.81492	0.082513
2011-11-24	6.357	0.81557	0.082366
2011-11-25	6.3554	0.81524	0.082255
2011-11-28	6.3585	0.81576	0.081871
2011-11-29	6.3587	0.81571	0.081334
2011-11-30	6.3482	0.815	0.081314
2011-12-01	6.3353	0.815	0.081609
2011-12-02	6.331	0.81484	0.081428
2011-12-05	6.3349	0.81537	0.081118
2011-12-06	6.3334	0.81481	0.081411
2011-12-07	6.3342	0.8149	0.081506
2011-12-08	6.3319	0.81457	0.081549
2011-12-09	6.3352	0.81459	0.081529
2011-12-12	6.3297	0.81348	0.081521
2011-12-13	6.3359	0.8141	0.081302
2011-12-14	6.3396	0.81483	0.080127
2011-12-15	6.3421	0.81479	0.081252
2011-12-16	6.3352	0.81423	0.081382
2011-12-19	6.3303	0.81321	0.081288
2011-12-20	6.3351	0.81396	0.081214
2011-12-21	6.3248	0.81301	0.081228
2011-12-22	6.3253	0.81293	0.080985
2011-12-23	6.3209	0.81244	0.080804
2011-12-26	6.3167	0.81223	0.080973
2011-12-27	6.3152	0.81199	0.081016
2011-12-28	6.3146	0.8119	0.08117
2011-12-29	6.3157	0.81219	0.081085
2011-12-30	6.3009	0.8107	0.081103
2012-01-04	6.3001	0.81112	0.082198
2012-01-05	6.3115	0.81266	0.082229
2012-01-06	6.3166	0.81346	0.081816
2012-01-09	6.3236	0.81421	0.082162
2012-01-10	6.3171	0.81344	0.082168
2012-01-11	6.3171	0.81329	0.082142
2012-01-12	6.323	0.81403	0.082218
2012-01-13	6.3201	0.81359	0.082288
2012-01-16	6.3306	0.81497	0.082381
2012-01-17	6.325	0.81426	0.08233
2012-01-18	6.3205	0.81396	0.082314
2012-01-19	6.3173	0.81386	0.082283
2012-01-20	6.3138	0.81347	0.081886
2012-01-30	6.3056	0.813	0.082152
2012-01-31	6.3115	0.81363	0.082649
2012-02-01	6.3103	0.81359	0.082796
2012-02-02	6.3075	0.81339	0.082846
2012-02-03	6.3102	0.81363	0.082795
2012-02-06	6.3108	0.81376	0.082478
2012-02-07	6.3116	0.81397	0.082445
2012-02-08	6.3027	0.81283	0.081954
2012-02-09	6.3009	0.81257	0.08174
2012-02-10	6.2937	0.8115	0.081026
2012-02-13	6.2939	0.81154	0.080945
2012-02-14	6.2947	0.81174	0.081164
2012-02-15	6.2958	0.81197	0.080258
2012-02-16	6.2291	0.8124	0.080279
2012-02-17	6.2951	0.81184	0.079766
2012-02-20	6.2938	0.81172	0.079053
2012-02-21	6.296	0.81194	0.078991
2012-02-22	6.2988	0.81227	0.078898
2012-02-23	6.3031	0.81278	0.07847
2012-02-24	6.2965	0.81189	0.078652
2012-02-27	6.2985	0.81223	0.077534
2012-02-28	6.2961	0.81182	0.078402
2012-02-29	6.2919	0.81132	0.078107
2012-03-01	6.3016	0.81251	0.07763
2012-03-02	6.298	0.81207	0.07749
2012-03-05	6.3121	0.81357	0.077378
2012-03-06	6.3141	0.81331	0.077512
2012-03-07	6.3213	0.81434	0.078287
2012-03-08	6.3235	0.81452	0.077823
2012-03-09	6.3073	0.81298	0.077272
2012-03-12	6.3282	0.81569	0.076929
2012-03-13	6.3259	0.81544	0.076766
2012-03-14	6.3328	0.81601	0.076157
2012-03-15	6.3359	0.81616	0.075445
2012-03-16	6.32	0.81425	0.07563
2012-03-19	6.3082	0.8126	0.075525
2012-03-20	6.3029	0.81193	0.075583
2012-03-21	6.3092	0.81266	0.075419
2012-03-22	6.3004	0.81151	0.075522
2012-03-23	6.2891	0.80989	0.076075
2012-03-26	6.2858	0.80925	0.075938
2012-03-27	6.284	0.80893	0.07577
2012-03-28	6.2912	0.81019	0.075802
2012-03-29	6.2932	0.81059	0.076074
2012-03-30	6.2943	0.81063	0.07669
2012-04-05	6.3035	0.81173	0.076541
2012-04-06	6.3072	0.81232	0.076632
2012-04-09	6.3021	0.81148	0.077336
2012-04-10	6.3048	0.8119	0.077104
2012-04-11	6.3018	0.81155	0.078036
2012-04-12	6.2984	0.81117	0.077744
2012-04-13	6.2879	0.80999	0.077681
2012-04-16	6.296	0.81146	0.077767
2012-04-17	6.2896	0.81072	0.078127
2012-04-18	6.2948	0.8112	0.077594
2012-04-19	6.3004	0.81174	0.077367
2012-04-20	6.3042	0.81216	0.077234
2012-04-23	6.297	0.81134	0.077259
2012-04-24	6.3003	0.81181	0.077642
2012-04-25	6.2923	0.81089	0.077268
2012-04-26	6.2829	0.80966	0.077247
2012-04-27	6.2787	0.80922	0.077362
2012-05-02	6.267	0.80784	0.078089
2012-05-03	6.2697	0.80811	0.078239
2012-05-04	6.2721	0.80831	0.078245
2012-05-07	6.2858	0.80978	0.078686
2012-05-08	6.2804	0.80905	0.07853
2012-05-09	6.2865	0.80991	0.078714
2012-05-10	6.2941	0.81075	0.078948
2012-05-11	6.2952	0.81093	0.078793
2012-05-14	6.304	0.81182	0.078736
2012-05-15	6.311	0.81266	0.078962
2012-05-16	6.3205	0.81367	0.078628
2012-05-17	6.3233	0.81401	0.07877
2012-05-18	6.3209	0.81343	0.079613
2012-05-21	6.3116	0.81269	0.079717
2012-05-22	6.3077	0.81242	0.079457
2012-05-23	6.3208	0.81393	0.079015
2012-05-24	6.3247	0.81453	0.079616
2012-05-25	6.326	0.81484	0.079388
2012-05-28	6.3236	0.81468	0.079512
2012-05-29	6.3262	0.81487	0.07948
2012-05-30	6.3297	0.81526	0.079604
2012-05-31	6.3355	0.81583	0.080293
2012-06-01	6.3308	0.81549	0.080686
2012-06-04	6.3276	0.8152	0.08097
2012-06-05	6.3225	0.81487	0.080687
2012-06-06	6.3261	0.81535	0.080462
2012-06-07	6.317	0.81419	0.079757
2012-06-08	6.3188	0.81446	0.079495
2012-06-11	6.3169	0.81426	0.079329
2012-06-12	6.3292	0.81574	0.07978
2012-06-13	6.3271	0.81556	0.079492
2012-06-14	6.3191	0.81446	0.079687
2012-06-15	6.3089	0.81312	0.079509
2012-06-18	6.3005	0.812	0.079557
2012-06-19	6.3016	0.81217	0.079811
2012-06-20	6.3004	0.81199	0.079612
2012-06-21	6.304	0.81245	0.079408
2012-06-25	6.323	0.81475	0.0784
2012-06-26	6.3211	0.81462	0.079395
2012-06-27	6.3173	0.81421	0.079604
2012-06-28	6.319	0.81445	0.079368
2012-06-29	6.3249	0.81522	0.079648
2012-07-02	6.3146	0.81401	0.07919
2012-07-03	6.3178	0.81447	0.079481
2012-07-04	6.3121	0.81401	0.079146
2012-07-05	6.3193	0.81493	0.079085
2012-07-06	6.3249	0.81564	0.079419
2012-07-09	6.3293	0.81624	0.079617
2012-07-10	6.3195	0.81493	0.079575
2012-07-11	6.3209	0.81512	0.079728
2012-07-12	6.3215	0.8152	0.079419
2012-07-13	6.3247	0.81537	0.079825
2012-07-16	6.3208	0.81489	0.079838
2012-07-17	6.3167	0.81437	0.080102
2012-07-18	6.314	0.81406	0.079855
2012-07-19	6.3126	0.81386	0.08021
2012-07-20	6.3112	0.81374	0.080155
2012-07-23	6.327	0.81569	0.080547
2012-07-24	6.3339	0.81652	0.080786
2012-07-25	6.3429	0.81759	0.08113
2012-07-26	6.3381	0.81697	0.081116
2012-07-27	6.3325	0.81624	0.080879
2012-07-30	6.3303	0.8161	0.080708
2012-07-31	6.332	0.81649	0.081028
2012-08-01	6.3305	0.81641	0.081064
2012-08-02	6.3392	0.81744	0.08077
2012-08-03	6.3421	0.81786	0.08122
2012-08-06	6.3353	0.817	0.080614
2012-08-07	6.3332	0.81663	0.081017
2012-08-08	6.3378	0.81727	0.080598
2012-08-09	6.3387	0.8173	0.080816
2012-08-10	6.3447	0.81805	0.080719
2012-08-13	6.3456	0.8181	0.081051
2012-08-14	6.3443	0.8179	0.080887
2012-08-15	6.3482	0.81842	0.080501
2012-08-16	6.3495	0.81854	0.080314
2012-08-17	6.3449	0.81797	0.080054
2012-08-20	6.3478	0.81838	0.079843
2012-08-21	6.3418	0.81758	0.079935
2012-08-22	6.3348	0.8167	0.07985
2012-08-23	6.3316	0.81632	0.080586
2012-08-24	6.3305	0.81615	0.080514
2012-08-27	6.3392	0.81729	0.080375
2012-08-28	6.3411	0.81756	0.080556
2012-08-29	6.3391	0.81733	0.080556
2012-08-30	6.3435	0.81786	0.080497
2012-08-31	6.3449	0.81803	0.080696
2012-09-03	6.3415	0.81758	0.081011
2012-09-04	6.3402	0.8174	0.08094
2012-09-05	6.346	0.81816	0.080859
2012-09-06	6.3439	0.81786	0.080864
2012-09-07	6.3412	0.81755	0.080394
2012-09-10	6.3375	0.81711	0.080983
2012-09-11	6.3391	0.81739	0.081052
2012-09-12	6.3355	0.81703	0.081397
2012-09-13	6.3338	0.81675	0.081395
2012-09-14	6.3317	0.81654	0.08155
2012-09-17	6.3295	0.81651	0.081029
2012-09-18	6.3353	0.81721	0.080516
2012-09-19	6.3392	0.81769	0.080492
2012-09-20	6.338	0.8175	0.080775
2012-09-21	6.3426	0.81805	0.080952
2012-09-24	6.3411	0.81786	0.081156
2012-09-25	6.343	0.81815	0.081424
2012-09-26	6.3443	0.81824	0.081543
2012-09-27	6.3459	0.81841	0.08164
2012-09-28	6.341	0.81782	0.081684
2012-10-08	6.3426	0.81808	0.080445
2012-10-09	6.3441	0.81833	0.08091
2012-10-10	6.3449	0.81843	0.081034
2012-10-11	6.3391	0.81766	0.08117
2012-10-12	6.3264	0.81606	0.080627
2012-10-15	6.3112	0.81415	0.080434
2012-10-16	6.3106	0.81414	0.079914
2012-10-17	6.3028	0.81315	0.079879
2012-10-18	6.3021	0.813	0.079534
2012-10-19	6.3052	0.81352	0.079316
2012-10-22	6.3071	0.81378	0.079403
2012-10-23	6.3078	0.81386	0.078738
2012-10-24	6.3081	0.81393	0.078875
2012-10-25	6.3047	0.81347	0.078859
2012-10-26	6.301	0.81301	0.078449
2012-10-29	6.2992	0.81275	0.078968
2012-10-30	6.3028	0.81323	0.07875
2012-10-31	6.3002	0.81291	0.078947
2012-11-01	6.3017	0.81311	0.078727
2012-11-02	6.3045	0.81347	0.078399
2012-11-05	6.3082	0.81395	0.078224
2012-11-06	6.3078	0.81389	0.078518
2012-11-07	6.3067	0.81372	0.078362
2012-11-08	6.306	0.81364	0.078739
2012-11-09	6.3012	0.81294	0.079144
2012-11-12	6.292	0.81177	0.079151
2012-11-13	6.2891	0.81143	0.078874
2012-11-14	6.2881	0.81133	0.078948
2012-11-15	6.2905	0.8116	0.078177
2012-11-16	6.2945	0.81201	0.07738
2012-11-19	6.2975	0.81241	0.0771
2012-11-20	6.2926	0.81174	0.07714
2012-11-21	6.2908	0.81167	0.07675
2012-11-22	6.2918	0.81176	0.076131
2012-11-23	6.2906	0.81161	0.076181
2012-11-26	6.2884	0.81137	0.075964
2012-11-27	6.2852	0.81098	0.076494
2012-11-28	6.2902	0.81162	0.076379
2012-11-29	6.291	0.81173	0.076407
2012-11-30	6.2892	0.8115	0.07641
2012-12-03	6.2908	0.81171	0.07607
2012-12-04	6.2885	0.80258	0.076359
2012-12-05	6.2871	0.81123	0.076595
2012-12-06	6.2911	0.81175	0.076171
2012-12-07	6.293	0.81199	0.076151
2012-12-10	6.2922	0.81189	0.076074
2012-12-11	6.2906	0.81169	0.076175
2012-12-12	6.2883	0.81139	0.076038
2012-12-13	6.2887	0.81144	0.075313
2012-12-14	6.2923	0.8119	0.075014
2012-12-17	6.2892	0.8115	0.07472
2012-12-18	6.288	0.81135	0.074834
2012-12-19	6.2865	0.81116	0.074434
2012-12-20	6.2877	0.81131	0.07493
2012-12-21	6.2881	0.81136	0.074409
2012-12-24	6.2913	0.81178	0.074329
2012-12-25	6.2931	0.81197	0.07405
2012-12-26	6.2943	0.81212	0.073742
2012-12-27	6.2949	0.81217	0.073337
2012-12-28	6.2896	0.81137	0.072634
2012-12-31	6.2855	0.81085	0.073049
2013-01-04	6.2897	0.81145	0.071769
2013-01-07	6.2872	0.81114	0.071235
2013-01-08	6.2804	0.81025	0.071702
2013-01-09	6.2814	0.81036	0.071985
2013-01-10	6.2793	0.81004	0.07115
2013-01-11	6.2712	0.80904	0.070425
2013-01-14	6.2695	0.80871	0.069928
2013-01-15	6.2691	0.80864	0.069876
2013-01-16	6.2745	0.80934	0.070592
2013-01-17	6.2767	0.80964	0.07128
2013-01-18	6.2752	0.80944	0.069657
2013-01-21	6.279	0.80991	0.069672
2013-01-22	6.2796	0.80991	0.069853
2013-01-23	6.2762	0.80948	0.07068
2013-01-24	6.2783	0.80978	0.070698
2013-01-25	6.2805	0.81005	0.069214
2013-01-28	6.2818	0.81007	0.068796
2013-01-29	6.2851	0.8102	0.069197
2013-01-30	6.2806	0.80952	0.069055
2013-01-31	6.2795	0.80941	0.068802
2013-02-01	6.2819	0.81011	0.068282
2013-02-04	6.286	0.81043	0.06763
2013-02-05	6.285	0.81048	0.067941
2013-02-06	6.2881	0.81094	0.067038
2013-02-07	6.2898	0.8112	0.06712
2013-02-08	6.2793	0.80962	0.067024
2013-02-18	6.2816	0.81005	0.066791
2013-02-19	6.2821	0.81011	0.066836
2013-02-20	6.2804	0.80991	0.066927
2013-02-21	6.2846	0.81041	0.066888
2013-02-22	6.2871	0.81065	0.067275
2013-02-25	6.2892	0.8108	0.066714
2013-02-26	6.2856	0.81036	0.06776
2013-02-27	6.2842	0.80996	0.068104
2013-02-28	6.2779	0.80934	0.067884
2013-03-01	6.2798	0.80972	0.067509
2013-03-04	6.2822	0.81009	0.066989
2013-03-05	6.2797	0.80968	0.067096
2013-03-06	6.2745	0.809	0.067163
2013-03-07	6.2785	0.80948	0.066642
2013-03-08	6.2719	0.80857	0.066029
2013-03-11	6.2769	0.80923	0.065175
2013-03-12	6.2746	0.8089	0.064838
2013-03-13	6.2726	0.80863	0.065283
2013-03-14	6.2752	0.80884	0.065259
2013-03-15	6.2723	0.80852	0.065117
2013-03-18	6.2741	0.80845	0.066002
2013-03-19	6.2758	0.80859	0.065582
2013-03-20	6.2716	0.80805	0.065962
2013-03-21	6.2731	0.80815	0.065298
2013-03-22	6.2711	0.80783	0.065888
2013-03-25	6.2692	0.8076	0.065955
2013-03-26	6.2715	0.80799	0.066539
2013-03-27	6.2727	0.80841	0.066163
2013-03-28	6.2742	0.80824	0.066334
2013-03-29	6.2689	0.80757	0.066486
2013-04-01	6.2674	0.80734	0.066336
2013-04-02	6.2586	0.80622	0.067192
2013-04-03	6.2609	0.80659	0.066802
2013-04-08	6.265	0.80688	0.063449
2013-04-09	6.2639	0.80683	0.062949
2013-04-10	6.2548	0.80574	0.063023
2013-04-11	6.2578	0.80621	0.062647
2013-04-12	6.2506	0.80533	0.062615
2013-04-15	6.2454	0.80462	0.063303
2013-04-16	6.2408	0.80399	0.064372
2013-04-17	6.2342	0.80316	0.063557
2013-04-18	6.2416	0.80402	0.063574
2013-04-19	6.2395	0.80367	0.063355
2013-04-22	6.2415	0.8039	0.062437
2013-04-23	6.236	0.8032	0.062782
2013-04-24	6.2384	0.80347	0.062513
2013-04-25	6.23	0.8024	0.062536
2013-04-26	6.2208	0.80119	0.062675
2013-05-02	6.2082	0.80005	0.063807
2013-05-03	6.2152	0.80095	0.063337
2013-05-06	6.2114	0.80055	0.062685
2013-05-07	6.2083	0.80005	0.062543
2013-05-08	6.198	0.79859	0.062634
2013-05-09	6.1925	0.79806	0.062507
2013-05-10	6.2016	0.79918	0.061408
2013-05-13	6.2072	0.79982	0.060793
2013-05-14	6.2035	0.7993	0.060944
2013-05-15	6.207	0.7997	0.060632
2013-05-16	6.2096	0.80002	0.06064
2013-05-17	6.1997	0.79855	0.060534
2013-05-20	6.1998	0.79861	0.060212
2013-05-21	6.1911	0.79754	0.060363
2013-05-22	6.1904	0.79763	0.060243
2013-05-23	6.1947	0.79811	0.059797
2013-05-24	6.1867	0.79694	0.060378
2013-05-27	6.1811	0.79619	0.061169
2013-05-28	6.1818	0.79627	0.060765
2013-05-29	6.1856	0.79667	0.060365
2013-05-30	6.182	0.79626	0.060982
2013-05-31	6.1796	0.79599	0.060997
2013-06-03	6.1806	0.79614	0.061434
2013-06-04	6.1735	0.79529	0.061935
2013-06-05	6.1757	0.79572	0.061494
2013-06-06	6.1737	0.79555	0.062099
2013-06-07	6.162	0.79381	0.063246
2013-06-13	6.1612	0.79347	0.064521
2013-06-14	6.1607	0.79345	0.064781
2013-06-17	6.1598	0.79371	0.06506
2013-06-18	6.1651	0.79454	0.064927
2013-06-19	6.1677	0.79493	0.06447
2013-06-20	6.1698	0.7953	0.064005
2013-06-21	6.1766	0.79645	0.06338
2013-06-24	6.1807	0.79671	0.062741
2013-06-25	6.1767	0.79614	0.063147
2013-06-26	6.1779	0.79639	0.062924
2013-06-27	6.1797	0.79652	0.063188
2013-06-28	6.1787	0.79655	0.062607
2013-07-01	6.1805	0.79676	0.062131
2013-07-02	6.1773	0.79645	0.061921
2013-07-03	6.1803	0.79704	0.061297
2013-07-04	6.1755	0.79644	0.06174
2013-07-05	6.179	0.79689	0.06154
2013-07-08	6.1807	0.79705	0.06088
2013-07-09	6.173	0.79595	0.061031
2013-07-10	6.1652	0.79484	0.06098
2013-07-11	6.1599	0.79416	0.061836
2013-07-12	6.1631	0.79458	0.062191
2013-07-15	6.1663	0.79484	0.062035
2013-07-16	6.1692	0.79518	0.061625
2013-07-17	6.1652	0.7947	0.062052
2013-07-18	6.172	0.79562	0.061865
2013-07-19	6.1751	0.79598	0.061223
2013-07-22	6.1721	0.79562	0.061652
2013-07-23	6.1702	0.7953	0.061976
2013-07-24	6.1695	0.79529	0.061904
2013-07-25	6.1759	0.79611	0.061461
2013-07-26	6.172	0.79562	0.062114
2013-07-29	6.1705	0.7955	0.062854
2013-07-30	6.177	0.79632	0.062849
2013-07-31	6.1788	0.79672	0.062956
2013-08-01	6.1778	0.79659	0.063011
2013-08-02	6.1817	0.79701	0.062032
2013-08-05	6.1767	0.79637	0.062265
2013-08-06	6.1753	0.7961	0.062841
2013-08-07	6.1726	0.7958	0.063272
2013-08-08	6.1703	0.79547	0.063717
2013-08-09	6.1668	0.79509	0.063607
2013-08-12	6.1665	0.79512	0.06403
2013-08-13	6.1705	0.79562	0.063269
2013-08-14	6.172	0.79579	0.062727
2013-08-15	6.1696	0.79549	0.062917
2013-08-16	6.1666	0.79526	0.063281
2013-08-19	6.169	0.79565	0.063007
2013-08-20	6.1697	0.7956	0.06305
2013-08-21	6.1675	0.79532	0.06316
2013-08-22	6.1698	0.79558	0.062945
2013-08-23	6.171	0.79569	0.062407
2013-08-26	6.168	0.79534	0.062344
2013-08-27	6.1688	0.7954	0.062668
2013-08-28	6.1667	0.79504	0.063344
2013-08-29	6.169	0.79545	0.062962
2013-08-30	6.1709	0.79569	0.062645
2013-09-02	6.1702	0.79568	0.06252
2013-09-03	6.1718	0.79592	0.061832
2013-09-04	6.1729	0.79593	0.061874
2013-09-05	6.1696	0.79553	0.061765
2013-09-06	6.1728	0.79588	0.061604
2013-09-09	6.1642	0.79479	0.061713
2013-09-10	6.1612	0.79455	0.061669
2013-09-11	6.1601	0.79437	0.061346
2013-09-12	6.1575	0.79408	0.061649
2013-09-13	6.1578	0.79413	0.061726
2013-09-16	6.1554	0.79381	0.062167
2013-09-17	6.1571	0.79402	0.061991
2013-09-18	6.1557	0.79384	0.061991
2013-09-23	6.1475	0.79285	0.061921
2013-09-24	6.1485	0.79303	0.06216
2013-09-25	6.1497	0.79317	0.062224
2013-09-26	6.1477	0.79286	0.062419
2013-09-27	6.1495	0.79305	0.062107
2013-09-30	6.148	0.79287	0.062793
2013-10-08	6.1415	0.79202	0.063452
2013-10-09	6.143	0.79224	0.063208
2013-10-10	6.1452	0.79248	0.062953
2013-10-11	6.1458	0.79254	0.062471
2013-10-14	6.1406	0.79191	0.062452
2013-10-15	6.1412	0.79194	0.062216
2013-10-16	6.1408	0.7919	0.062271
2013-10-17	6.1431	0.7922	0.062039
2013-10-18	6.1372	0.79149	0.062503
2013-10-21	6.1352	0.79128	0.062509
2013-10-22	6.1395	0.7919	0.062404
2013-10-23	6.133	0.7911	0.062411
2013-10-24	6.1335	0.79111	0.062826
2013-10-25	6.1333	0.79099	0.062929
2013-10-28	6.1336	0.79108	0.062757
2013-10-29	6.1373	0.79155	0.062769
2013-10-30	6.1412	0.79208	0.062409
2013-10-31	6.1425	0.79226	0.062332
2013-11-01	6.1452	0.79263	0.062476
2013-11-04	6.1482	0.79307	0.062188
2013-11-05	6.1447	0.79271	0.062244
2013-11-06	6.1475	0.79307	0.062268
2013-11-07	6.145	0.79273	0.062146
2013-11-08	6.1355	0.79151	0.062497
2013-11-11	6.139	0.79196	0.061864
2013-11-12	6.136	0.79147	0.061746
2013-11-13	6.1342	0.7912	0.061493
2013-11-14	6.1315	0.79082	0.061697
2013-11-15	6.1351	0.79126	0.061122
2013-11-18	6.1332	0.791	0.061072
2013-11-19	6.1317	0.79093	0.061333
2013-11-20	6.1305	0.79086	0.061136
2013-11-21	6.1366	0.79164	0.061043
2013-11-22	6.138	0.79177	0.060532
2013-11-25	6.1342	0.79123	0.060463
2013-11-26	6.1357	0.79142	0.060398
2013-11-27	6.133	0.79113	0.060446
2013-11-28	6.1343	0.79125	0.059976
2013-11-29	6.1325	0.79103	0.059844
2013-12-02	6.1325	0.79103	0.059844
2013-12-03	6.1352	0.7914	0.059517
2013-12-04	6.13	0.79069	0.059722
2013-12-05	6.131	0.79077	0.059805
2013-12-06	6.1232	0.78969	0.060085
2013-12-09	6.113	0.78834	0.059325
2013-12-10	6.1114	0.78823	0.05905
2013-12-11	6.11	0.78805	0.059291
2013-12-12	6.1115	0.78816	0.059472
2013-12-13	6.1148	0.78863	0.058976
2013-12-16	6.1124	0.78836	0.059154
2013-12-17	6.1108	0.78813	0.059216
2013-12-18	6.1105	0.78823	0.059361
2013-12-19	6.1183	0.78918	0.058608
2013-12-20	6.1196	0.78923	0.058542
2013-12-23	6.1161	0.78872	0.058698
2013-12-24	6.1145	0.78858	0.058591
2013-12-25	6.116	0.78867	0.058568
2013-12-26	6.1156	0.78862	0.058325
2013-12-27	6.105	0.78721	0.058179
2013-12-30	6.1024	0.78693	0.057884
2013-12-31	6.0969	0.78623	0.057771
2014-01-02	6.099	0.78658	0.057827
2014-01-03	6.1039	0.7872	0.058115
2014-01-06	6.1059	0.78742	0.058216
2014-01-07	6.1042	0.78717	0.058352
2014-01-08	6.1079	0.78769	0.058194
2014-01-09	6.1109	0.78806	0.058163
2014-01-10	6.1008	0.78676	0.058119
2014-01-13	6.095	0.78601	0.058542
2014-01-14	6.093	0.78575	0.058901
2014-01-15	6.1005	0.78673	0.058403
2014-01-16	6.1065	0.78749	0.05816
2014-01-17	6.1041	0.78716	0.058383
2014-01-20	6.1083	0.78757	0.058534
2014-01-21	6.1066	0.78729	0.058385
2014-01-22	6.1087	0.78752	0.058453
2014-01-23	6.1107	0.78768	0.058233
2014-01-24	6.1035	0.78661	0.058873
2014-01-27	6.1022	0.78594	0.059536
2014-01-28	6.1053	0.7862	0.059367
2014-01-29	6.1073	0.7867	0.059052
2014-01-30	6.105	0.78625	0.059625
2014-02-07	6.1089	0.78733	0.059732
2014-02-10	6.1083	0.78733	0.059468
2014-02-11	6.1069	0.78725	0.059632
2014-02-12	6.1078	0.78747	0.059358
2014-02-13	6.11	0.78775	0.059483
2014-02-14	6.107	0.78738	0.059602
2014-02-17	6.1053	0.78722	0.059448
2014-02-18	6.1073	0.78755	0.059679
2014-02-19	6.1103	0.78794	0.059591
2014-02-20	6.1146	0.7884	0.059691
2014-02-21	6.1176	0.78879	0.059624
2014-02-24	6.1189	0.78893	0.059609
2014-02-25	6.1184	0.78862	0.059635
2014-02-26	6.1192	0.78848	0.059863
2014-02-27	6.1224	0.78887	0.059815
2014-02-28	6.1214	0.78878	0.060022
2014-03-03	6.119	0.78836	0.060391
2014-03-04	6.1236	0.78907	0.060334
2014-03-05	6.1257	0.78829	0.059941
2014-03-06	6.1249	0.78924	0.059841
2014-03-07	6.1201	0.78858	0.059394
2014-03-10	6.1312	0.79004	0.059333
2014-03-11	6.1327	0.79021	0.05938
2014-03-12	6.1343	0.79033	0.059597
2014-03-13	6.132	0.78984	0.05967
2014-03-14	6.1346	0.79	0.060245
2014-03-17	6.1321	0.78954	0.060504
2014-03-18	6.1341	0.78989	0.060276
2014-03-19	6.1351	0.79003	0.060562
2014-03-20	6.146	0.79144	0.060132
2014-03-21	6.1475	0.79176	0.060225
2014-03-24	6.1452	0.79207	0.060251
2014-03-25	6.1426	0.7918	0.060208
2014-03-26	6.144	0.79211	0.060151
2014-03-27	6.1465	0.79218	0.060472
2014-03-28	6.149	0.79257	0.060365
2014-03-31	6.1521	0.79305	0.05992
2014-04-01	6.1503	0.79285	0.059761
2014-04-02	6.1493	0.79272	0.059443
2014-04-03	6.152	0.79311	0.059376
2014-04-04	6.1557	0.79352	0.059387
2014-04-08	6.1527	0.79334	0.059908
2014-04-09	6.149	0.79302	0.060406
2014-04-10	6.151	0.79333	0.060336
2014-04-11	6.1495	0.79311	0.060749
2014-04-14	6.1531	0.79358	0.060744
2014-04-15	6.1571	0.79408	0.060646
2014-04-16	6.1589	0.79426	0.060546
2014-04-17	6.1575	0.79409	0.060491
2014-04-18	6.1586	0.79421	0.060304
2014-04-21	6.1591	0.79429	0.060188
2014-04-22	6.161	0.79456	0.060146
2014-04-23	6.1599	0.79457	0.060171
2014-04-24	6.1599	0.79438	0.060256
2014-04-25	6.1576	0.79419	0.060385
2014-04-28	6.1565	0.79404	0.060505
2014-04-29	6.1556	0.79396	0.060261
2014-04-30	6.158	0.79425	0.060235
2014-05-05	6.156	0.79404	0.060495
2014-05-06	6.1565	0.79415	0.060531
2014-05-07	6.1542	0.79389	0.0607
2014-05-08	6.1557	0.79403	0.060574
2014-05-09	6.1581	0.79442	0.060755
2014-05-12	6.1625	0.79499	0.060556
2014-05-13	6.1636	0.79513	0.060445
2014-05-14	6.1653	0.79535	0.060531
2014-05-15	6.164	0.79519	0.060685
2014-05-16	6.1628	0.79501	0.060825
2014-05-19	6.1636	0.79509	0.060843
2014-05-20	6.1626	0.79495	0.060907
2014-05-21	6.1645	0.79516	0.061008
2014-05-22	6.1658	0.79528	0.060953
2014-05-23	6.1681	0.7955	0.060753
2014-05-26	6.1699	0.7958	0.060728
2014-05-27	6.1687	0.7956	0.060683
2014-05-28	6.1694	0.79576	0.060774
2014-05-29	6.1705	0.79587	0.060878
2014-05-30	6.1695	0.79578	0.060903
2014-06-03	6.171	0.79588	0.06045
2014-06-04	6.1693	0.79575	0.06031
2014-06-05	6.1708	0.79593	0.060288
2014-06-06	6.1623	0.7949	0.060434
2014-06-09	6.1485	0.7931	0.060276
2014-06-10	6.1451	0.79274	0.060231
2014-06-11	6.1506	0.79346	0.060214
2014-06-12	6.1516	0.79358	0.060436
2014-06-13	6.1503	0.79342	0.060561
2014-06-16	6.1537	0.79386	0.060469
2014-06-17	6.1529	0.79379	0.060506
2014-06-18	6.1559	0.79415	0.060421
2014-06-19	6.1531	0.79384	0.060511
2014-06-20	6.1524	0.7938	0.060528
2014-06-23	6.1557	0.79415	0.06043
2014-06-24	6.1545	0.79401	0.06057
2014-06-25	6.1555	0.79409	0.060536
2014-06-26	6.1538	0.79389	0.060638
2014-06-27	6.1543	0.79393	0.060721
2014-06-30	6.1528	0.79375	0.060815
2014-07-01	6.1523	0.79381	0.060778
2014-07-02	6.1549	0.7941	0.060691
2014-07-03	6.1581	0.79457	0.060582
2014-07-04	6.1642	0.79532	0.06042
2014-07-07	6.1658	0.79555	0.060483
2014-07-08	6.1626	0.79514	0.06067
2014-07-09	6.1565	0.79438	0.060815
2014-07-10	6.1443	0.79281	0.0607
2014-07-11	6.1469	0.79315	0.060791
2014-07-14	6.1485	0.79335	0.060784
2014-07-15	6.149	0.79342	0.060649
2014-07-16	6.1535	0.79399	0.060616
2014-07-17	6.1564	0.7943	0.060675
2014-07-18	6.1568	0.79434	0.060922
2014-07-21	6.1547	0.79404	0.060872
2014-07-22	6.1544	0.79395	0.06077
2014-07-23	6.1572	0.79432	0.060759
2014-07-24	6.1579	0.79449	0.060726
2014-07-25	6.1597	0.79476	0.06061
2014-07-28	6.1622	0.79512	0.060647
2014-07-29	6.1615	0.79502	0.060579
2014-07-30	6.1645	0.79542	0.060454
2014-07-31	6.1675	0.79581	0.060012
2014-08-01	6.1681	0.79588	0.060026
2014-08-04	6.1661	0.79562	0.060172
2014-08-05	6.1655	0.79555	0.060136
2014-08-06	6.1681	0.79586	0.060152
2014-08-07	6.167	0.7957	0.060377
2014-08-08	6.1562	0.79424	0.060393
2014-08-11	6.1522	0.7937	0.060292
2014-08-12	6.1517	0.79366	0.060174
2014-08-13	6.1533	0.79385	0.060166
2014-08-14	6.1545	0.79403	0.060129
2014-08-15	6.1538	0.79394	0.060053
2014-08-18	6.1528	0.79386	0.060067
2014-08-19	6.1548	0.79412	0.059948
2014-08-20	6.158	0.79452	0.059781
2014-08-21	6.1632	0.79518	0.05936
2014-08-22	6.1617	0.79505	0.05929
2014-08-25	6.1653	0.79549	0.059168
2014-08-26	6.1663	0.79563	0.059218
2014-08-27	6.1658	0.79554	0.059222
2014-08-28	6.1638	0.79533	0.059324
2014-08-29	6.1647	0.79543	0.059396
2014-09-01	6.168	0.79584	0.059157
2014-09-02	6.1684	0.79591	0.059041
2014-09-03	6.1697	0.79606	0.05862
2014-09-04	6.1666	0.79566	0.058748
2014-09-05	6.1707	0.79619	0.058471
2014-09-09	6.152	0.79379	0.058159
2014-09-10	6.1425	0.79255	0.05794
2014-09-11	6.1453	0.79291	0.057522
2014-09-12	6.1468	0.7931	0.057335
2014-09-15	6.1452	0.79286	0.057251
2014-09-16	6.1462	0.79296	0.057349
2014-09-17	6.145	0.7928	0.057314
2014-09-18	6.149	0.79331	0.056719
2014-09-19	6.1455	0.79286	0.056462
2014-09-22	6.1485	0.79323	0.056431
2014-09-23	6.147	0.79303	0.056527
2014-09-24	6.1462	0.79288	0.056541
2014-09-25	6.1497	0.79332	0.056282
2014-09-26	6.1508	0.79323	0.056624
2014-09-29	6.1539	0.79286	0.056269
2014-09-30	6.1525	0.79246	0.056242
2014-10-08	6.1493	0.79297	0.05684
2014-10-09	6.1461	0.79242	0.056784
2014-10-10	6.147	0.79249	0.057023
2014-10-13	6.1446	0.79209	0.057295
2014-10-14	6.1408	0.79155	0.057312
2014-10-15	6.1455	0.79224	0.057277
2014-10-16	6.1395	0.7915	0.057912
2014-10-17	6.1407	0.79159	0.057712
2014-10-20	6.1435	0.79192	0.057341
2014-10-21	6.141	0.79155	0.057444
2014-10-22	6.1437	0.79211	0.057385
2014-10-23	6.1459	0.79235	0.057312
2014-10-24	6.1467	0.79241	0.056846
2014-10-27	6.1446	0.79211	0.056813
2014-10-28	6.1421	0.79178	0.056894
2014-10-29	6.1405	0.79158	0.056717
2014-10-30	6.1457	0.79252	0.056358
2014-10-31	6.1461	0.79252	0.056162
2014-11-03	6.1525	0.79331	0.054474
2014-11-04	6.1543	0.79376	0.05403
2014-11-05	6.1503	0.79339	0.054022
2014-11-06	6.1565	0.79417	0.053567
2014-11-07	6.1602	0.79454	0.05337
2014-11-10	6.1377	0.7917	0.053746
2014-11-11	6.1413	0.792	0.053429
2014-11-12	6.1428	0.79221	0.052996
2014-11-13	6.1418	0.79207	0.053144
2014-11-14	6.1399	0.79173	0.052906
2014-11-17	6.1409	0.79191	0.052679
2014-11-18	6.143	0.79214	0.05265
2014-11-19	6.1397	0.7917	0.052419
2014-11-20	6.1417	0.79193	0.051942
2014-11-21	6.1387	0.79148	0.051968
2014-11-24	6.142	0.79177	0.052186
2014-11-25	6.139	0.7915	0.051948
2014-11-26	6.1354	0.79114	0.052075
2014-11-27	6.132	0.7908	0.052161
2014-11-28	6.1345	0.79126	0.051937
2014-12-01	6.1369	0.79139	0.051938
2014-12-02	6.1325	0.79077	0.05188
2014-12-03	6.1376	0.79145	0.051506
2014-12-04	6.1411	0.79206	0.051268
2014-12-05	6.1373	0.79175	0.051264
2014-12-08	6.1282	0.79061	0.050545
2014-12-09	6.1231	0.78996	0.050822
2014-12-10	6.1195	0.78932	0.051426
2014-12-11	6.1153	0.7889	0.052129
2014-12-12	6.1184	0.7893	0.051646
2014-12-15	6.1152	0.78884	0.051779
2014-12-16	6.1182	0.78914	0.052089
2014-12-17	6.1137	0.78844	0.052455
2014-12-18	6.1195	0.7891	0.051693
2014-12-19	6.1205	0.78921	0.051557
2014-12-22	6.122	0.78951	0.05146
2014-12-23	6.123	0.7894	0.051161
2014-12-24	6.1247	0.78949	0.050975
2014-12-25	6.1213	0.78869	0.051058
2014-12-26	6.1186	0.78848	0.051033
2014-12-29	6.1205	0.78861	0.051011
2014-12-30	6.1224	0.78917	0.050953
2014-12-31	6.119	0.78887	0.051371
2015-01-05	6.1248	0.78965	0.05116
2015-01-06	6.1256	0.78985	0.051484
2015-01-07	6.1269	0.79012	0.051762
2015-01-08	6.1302	0.79053	0.051511
2015-01-09	6.1296	0.79044	0.051343
2015-01-12	6.1233	0.78978	0.051937
2015-01-13	6.1195	0.7893	0.051977
2015-01-14	6.1205	0.7894	0.052164
2015-01-15	6.1193	0.78918	0.052234
2015-01-16	6.1188	0.78934	0.052775
2015-01-19	6.123	0.78997	0.052256
2015-01-20	6.1226	0.78975	0.052147
2015-01-21	6.1268	0.79031	0.0518
2015-01-22	6.1247	0.79011	0.052052
2015-01-23	6.1342	0.79122	0.051899
2015-01-26	6.1384	0.79181	0.052361
2015-01-27	6.1364	0.79153	0.051983
2015-01-28	6.1282	0.79051	0.052218
2015-01-29	6.1335	0.79118	0.052329
2015-01-30	6.137	0.79165	0.0521
2015-02-02	6.1385	0.7918	0.052544
2015-02-03	6.1369	0.79149	0.052485
2015-02-04	6.1318	0.79081	0.052298
2015-02-05	6.1366	0.79155	0.052546
2015-02-06	6.1261	0.79021	0.052469
2015-02-09	6.1311	0.79085	0.051838
2015-02-10	6.1295	0.79056	0.051929
2015-02-11	6.1315	0.79078	0.051582
2015-02-12	6.1333	0.79094	0.051238
2015-02-13	6.1288	0.79037	0.051729
2015-02-16	6.1273	0.79006	0.051962
2015-02-17	6.133	0.79044	0.052123
2015-02-25	6.1384	0.79144	0.051968
2015-02-26	6.1379	0.79136	0.051948
2015-02-27	6.1475	0.79265	0.051839
2015-03-02	6.1513	0.79326	0.051577
2015-03-03	6.1543	0.79358	0.051437
2015-03-04	6.1525	0.79333	0.051646
2015-03-05	6.1528	0.79338	0.051678
2015-03-06	6.1533	0.79338	0.051456
2015-03-09	6.1563	0.79358	0.051248
2015-03-10	6.1572	0.79347	0.050911
2015-03-11	6.1597	0.79377	0.051055
2015-03-12	6.1617	0.7934	0.050942
2015-03-13	6.1588	0.79312	0.05093
2015-03-16	6.1615	0.79346	0.050987
2015-03-17	6.1585	0.79315	0.050907
2015-03-18	6.1556	0.79298	0.050907
2015-03-19	6.146	0.79231	0.051338
2015-03-20	6.1496	0.7926	0.051078
2015-03-23	6.1448	0.79221	0.051288
2015-03-24	6.1398	0.79158	0.051361
2015-03-25	6.141	0.79183	0.051398
2015-03-26	6.1375	0.79144	0.051523
2015-03-27	6.1397	0.79178	0.05167
2015-03-30	6.1402	0.79186	0.051649
2015-03-31	6.1422	0.79209	0.051272
2015-04-01	6.1434	0.79226	0.051353
2015-04-02	6.1396	0.79191	0.051437
2015-04-03	6.1348	0.79131	0.051364
2015-04-07	6.1305	0.7908	0.05142
2015-04-08	6.1345	0.79127	0.051147
2015-04-09	6.1338	0.79143	0.051176
2015-04-10	6.137	0.79187	0.051063
2015-04-13	6.1395	0.79219	0.051275
2015-04-14	6.1407	0.79233	0.051404
2015-04-15	6.134	0.79137	0.051549
2015-04-16	6.1305	0.79093	0.051689
2015-04-17	6.1267	0.79041	0.051678
2015-04-20	6.1255	0.79031	0.051659
2015-04-21	6.128	0.7907	0.05151
2015-04-22	6.129	0.79083	0.051345
2015-04-23	6.1281	0.79071	0.051208
2015-04-24	6.1241	0.79021	0.051358
2015-04-27	6.122	0.78994	0.051627
2015-04-28	6.1209	0.78975	0.051574
2015-04-29	6.1169	0.78924	0.051643
2015-04-30	6.1137	0.78881	0.051522
2015-05-04	6.1165	0.7891	0.051059
2015-05-05	6.118	0.78912	0.051111
2015-05-06	6.1156	0.78897	0.051171
2015-05-07	6.1113	0.78836	0.051337
2015-05-08	6.1147	0.78863	0.051219
2015-05-11	6.1132	0.78841	0.051249
2015-05-12	6.1155	0.78885	0.051087
2015-05-13	6.1123	0.78849	0.051143
2015-05-14	6.1093	0.78812	0.051386
2015-05-15	6.1085	0.78811	0.051376
2015-05-18	6.1079	0.78802	0.051315
2015-05-19	6.1098	0.78824	0.05114
2015-05-20	6.1125	0.78847	0.050804
2015-05-21	6.1139	0.78863	0.050609
2015-05-22	6.1131	0.78846	0.050672
2015-05-25	6.1165	0.78896	0.050434
2015-05-26	6.1172	0.78909	0.050436
2015-05-27	6.1198	0.78941	0.04991
2015-05-28	6.1202	0.78912	0.049619
2015-05-29	6.1196	0.78927	0.049571
2015-06-01	6.1207	0.78947	0.049403
2015-06-02	6.1225	0.78953	0.049196
2015-06-03	6.1176	0.78881	0.049413
2015-06-04	6.1164	0.78888	0.049323
2015-06-05	6.1181	0.78924	0.049303
2015-06-08	6.1205	0.78947	0.049085
2015-06-09	6.1179	0.78918	0.049226
2015-06-10	6.1173	0.78901	0.049345
2015-06-11	6.115	0.78876	0.049902
2015-06-12	6.1167	0.78899	0.049682
2015-06-15	6.1169	0.78895	0.049727
2015-06-16	6.1155	0.78884	0.049712
2015-06-17	6.1158	0.7889	0.04972
2015-06-18	6.1126	0.78849	0.049686
2015-06-19	6.1104	0.78817	0.049873
2015-06-23	6.1119	0.78851	0.049791
2015-06-24	6.1142	0.78862	0.049571
2015-06-25	6.1148	0.78875	0.049532
2015-06-26	6.1137	0.78871	0.049737
2015-06-29	6.1168	0.789	0.049906
2015-06-30	6.1136	0.78861	0.050052
2015-07-01	6.1149	0.78882	0.050082
2015-07-02	6.1171	0.78906	0.049762
2015-07-03	6.116	0.78896	0.04991
2015-07-06	6.1172	0.78906	0.050088
2015-07-07	6.1166	0.78895	0.050019
2015-07-08	6.1175	0.78884	0.050152
2015-07-09	6.1151	0.78877	0.050838
2015-07-10	6.1153	0.78888	0.050456
2015-07-13	6.1133	0.78868	0.050061
2015-07-14	6.1165	0.78905	0.049655
2015-07-15	6.1152	0.78891	0.049758
2015-07-16	6.1173	0.78924	0.049566
2015-07-17	6.1192	0.78948	0.049449
2015-07-20	6.1197	0.7896	0.049472
2015-07-21	6.1199	0.78956	0.049381
2015-07-22	6.1168	0.78919	0.04956
2015-07-23	6.1172	0.78927	0.049478
2015-07-24	6.1169	0.78917	0.049503
2015-07-27	6.1176	0.78926	0.049609
2015-07-28	6.1154	0.78901	0.049796
2015-07-29	6.115	0.78893	0.049663
2015-07-30	6.1165	0.78913	0.049499
2015-07-31	6.1172	0.78908	0.049487
2015-08-03	6.1169	0.78902	0.049481
2015-08-04	6.1177	0.7891	0.049503
2015-08-05	6.1186	0.7891	0.04939
2015-08-06	6.1181	0.78923	0.049178
2015-08-07	6.1174	0.7892	0.049219
2015-08-10	6.1162	0.78894	0.049428
2015-08-11	6.2298	0.8036	0.049319
2015-08-12	6.3306	0.81583	0.050524
2015-08-13	6.401	0.82553	0.05126
2015-08-14	6.3975	0.82521	0.051441
2015-08-17	6.3969	0.82481	0.051451
2015-08-18	6.3966	0.82491	0.051418
2015-08-19	6.3963	0.82484	0.051431
2015-08-20	6.3915	0.82443	0.051551
2015-08-21	6.3864	0.82387	0.051669
2015-08-24	6.3862	0.82374	0.052304
2015-08-25	6.3987	0.82542	0.053713
2015-08-26	6.4043	0.82624	0.053919
2015-08-27	6.4085	0.82679	0.053557
2015-08-28	6.3986	0.82562	0.052994
2015-08-31	6.3893	0.82442	0.052718
2015-09-01	6.3752	0.82259	0.052667
2015-09-02	6.3619	0.82089	0.053021
2015-09-07	6.3584	0.82041	0.053466
2015-09-08	6.3639	0.82114	0.05332
2015-09-09	6.3632	0.82097	0.052964
2015-09-10	6.3772	0.82272	0.053001
2015-09-11	6.3719	0.82218	0.052753
2015-09-14	6.3709	0.82204	0.052803
2015-09-15	6.3665	0.82148	0.052898
2015-09-16	6.3712	0.82208	0.052947
2015-09-17	6.367	0.8215	0.052803
2015-09-18	6.3607	0.82072	0.053028
2015-09-21	6.3676	0.82163	0.053155
2015-09-22	6.3721	0.82221	0.052955
2015-09-23	6.3773	0.82288	0.053087
2015-09-24	6.3791	0.8231	0.053059
2015-09-25	6.3785	0.82299	0.053074
2015-09-28	6.3729	0.82227	0.05293
2015-09-29	6.366	0.8214	0.053181
2015-09-30	6.3613	0.82081	0.053043
2015-10-08	6.3505	0.81942	0.052945
2015-10-09	6.3493	0.81926	0.052935
2015-10-12	6.3406	0.81813	0.052766
2015-10-13	6.3231	0.81587	0.052709
2015-10-14	6.3408	0.81817	0.052978
2015-10-15	6.3402	0.81809	0.053316
2015-10-16	6.3436	0.81852	0.053389
2015-10-19	6.3527	0.8197	0.053203
2015-10-20	6.3614	0.82082	0.053255
2015-10-21	6.3473	0.819	0.05294
2015-10-22	6.3497	0.8193	0.052965
2015-10-23	6.3595	0.82058	0.052764
2015-10-26	6.3549	0.81998	0.052438
2015-10-27	6.3494	0.81927	0.05253
2015-10-28	6.3536	0.81981	0.052754
2015-10-29	6.3596	0.82059	0.052701
2015-10-30	6.3495	0.81929	0.052493
2015-11-02	6.3154	0.81489	0.052415
2015-11-03	6.331	0.81689	0.052473
2015-11-04	6.3343	0.81728	0.052348
2015-11-05	6.3381	0.81777	0.052208
2015-11-06	6.3459	0.81875	0.052153
2015-11-09	6.3578	0.82023	0.051729
2015-11-10	6.3602	0.82048	0.051636
2015-11-11	6.3614	0.82064	0.051688
2015-11-12	6.3628	0.82095	0.051804
2015-11-13	6.3655	0.82134	0.051945
2015-11-16	6.375	0.82251	0.052054
2015-11-17	6.374	0.82238	0.051731
2015-11-18	6.3796	0.82309	0.051706
2015-11-19	6.3791	0.82307	0.051655
2015-11-20	6.378	0.82296	0.051894
2015-11-23	6.3867	0.82406	0.051985
2015-11-24	6.3888	0.82435	0.051989
2015-11-25	6.3877	0.82421	0.052148
2015-11-26	6.3896	0.82444	0.052104
2015-11-27	6.3915	0.82467	0.052117
2015-11-30	6.3962	0.82528	0.052107
2015-12-01	6.3973	0.82534	0.051924
2015-12-02	6.3958	0.82508	0.05203
2015-12-03	6.3982	0.82553	0.051958
2015-12-04	6.3851	0.82386	0.052063
2015-12-07	6.3985	0.82561	0.051971
2015-12-08	6.4078	0.82675	0.05199
2015-12-09	6.414	0.82758	0.05216
2015-12-10	6.4236	0.82882	0.052792
2015-12-11	6.4358	0.8304	0.052855
2015-12-14	6.4495	0.83207	0.053343
2015-12-15	6.4559	0.833	0.053321
2015-12-16	6.4626	0.83385	0.05311
2015-12-17	6.4757	0.83553	0.052901
2015-12-18	6.4814	0.83605	0.052962
2015-12-21	6.4753	0.83529	0.053405
2015-12-22	6.4746	0.83519	0.053447
2015-12-23	6.4731	0.83497	0.053492
2015-12-24	6.4755	0.83548	0.053555
2015-12-25	6.4713	0.83486	0.053853
2015-12-28	6.475	0.83538	0.053809
2015-12-29	6.4864	0.83689	0.053916
2015-12-30	6.4895	0.83733	0.053842
2015-12-31	6.4936	0.83778	0.053875
2016-01-04	6.5032	0.83906	0.053993
2016-01-05	6.5169	0.8408	0.0547
2016-01-06	6.5314	0.84263	0.054828
2016-01-07	6.5646	0.8468	0.055246
2016-01-08	6.5636	0.84641	0.055872
2016-01-11	6.5626	0.8454	0.056163
2016-01-12	6.5628	0.84568	0.05593
2016-01-13	6.563	0.84582	0.055773
2016-01-14	6.5616	0.84545	0.055857
2016-01-15	6.5637	0.84404	0.055661
2016-01-18	6.559	0.84103	0.056099
2016-01-19	6.5596	0.84068	0.055884
2016-01-20	6.5578	0.83865	0.055834
2016-01-21	6.5585	0.83918	0.056037
2016-01-22	6.5572	0.83964	0.055778
2016-01-25	6.5557	0.84078	0.055431
2016-01-26	6.5548	0.84076	0.055493
2016-01-27	6.5533	0.84131	0.055481
2016-01-28	6.5528	0.84107	0.055357
2016-01-29	6.5516	0.84091	0.055205
2016-02-01	6.5539	0.84206	0.054112
2016-02-02	6.551	0.84221	0.054215
2016-02-03	6.5521	0.84007	0.054718
2016-02-04	6.5419	0.83979	0.055536
2016-02-05	6.5314	0.8389	0.055977
2016-02-15	6.5118	0.83612	0.057437
2016-02-16	6.513	0.83675	0.056839
2016-02-17	6.5237	0.83721	0.057014
2016-02-18	6.5152	0.8368	0.057203
2016-02-19	6.5186	0.83804	0.057669
2016-02-22	6.5165	0.83862	0.05783
2016-02-23	6.5273	0.84105	0.057794
2016-02-24	6.5302	0.84057	0.058312
2016-02-25	6.5318	0.84089	0.058282
2016-02-26	6.5338	0.84102	0.05775
2016-02-29	6.5452	0.84186	0.05763
2016-03-01	6.5385	0.84114	0.058208
2016-03-02	6.549	0.84241	0.057482
2016-03-03	6.5412	0.84156	0.057591
2016-03-04	6.5284	0.84029	0.057444
2016-03-07	6.5113	0.83858	0.057221
2016-03-08	6.5041	0.83752	0.0574
2016-03-09	6.5106	0.83827	0.057843
2016-03-10	6.5127	0.83871	0.057521
2016-03-11	6.4905	0.83602	0.05745
2016-03-14	6.4913	0.83649	0.05707
2016-03-15	6.5079	0.83872	0.05717
2016-03-16	6.5172	0.83985	0.057581
2016-03-17	6.4961	0.83736	0.057608
2016-03-18	6.4628	0.8333	0.058165
2016-03-21	6.4824	0.83594	0.058182
2016-03-22	6.4971	0.83793	0.057963
2016-03-23	6.4936	0.83748	0.057853
2016-03-24	6.515	0.83968	0.057923
2016-03-25	6.5223	0.84051	0.057727
2016-03-28	6.5232	0.84081	0.057476
2016-03-29	6.506	0.83865	0.057386
2016-03-30	6.4841	0.83602	0.057624
2016-03-31	6.4612	0.83325	0.05753
2016-04-01	6.4585	0.8328	0.057413
2016-04-05	6.4663	0.83386	0.058203
2016-04-06	6.4754	0.83488	0.058655
2016-04-07	6.4707	0.83436	0.058954
2016-04-08	6.4733	0.83424	0.059703
2016-04-11	6.4649	0.83332	0.059748
2016-04-12	6.4616	0.8332	0.059795
2016-04-13	6.4591	0.83291	0.059456
2016-04-14	6.4891	0.83651	0.059274
2016-04-15	6.4908	0.8368	0.059294
2016-04-18	6.4787	0.83541	0.059907
2016-04-19	6.47	0.83428	0.059341
2016-04-20	6.4579	0.83269	0.059154
2016-04-21	6.4803	0.8355	0.059013
2016-04-22	6.4898	0.83654	0.059322
2016-04-25	6.512	0.83953	0.058426
2016-04-26	6.4882	0.83649	0.05842
2016-04-27	6.4837	0.836	0.058291
2016-04-28	6.4954	0.83739	0.058231
2016-04-29	6.4589	0.83257	0.05982
2016-05-03	6.4565	0.8321	0.060789
2016-05-04	6.4943	0.83672	0.060917
2016-05-05	6.5128	0.83905	0.060848
2016-05-06	6.5202	0.84011	0.060764
2016-05-09	6.5105	0.83899	0.060613
2016-05-10	6.5233	0.84026	0.060181
2016-05-11	6.5209	0.84021	0.059714
2016-05-12	6.4959	0.83708	0.059953
2016-05-13	6.5246	0.84072	0.059877
2016-05-16	6.5343	0.84157	0.060135
2016-05-17	6.52	0.83991	0.059825
2016-05-18	6.5216	0.84013	0.059832
2016-05-19	6.5531	0.84372	0.059539
2016-05-20	6.551	0.84347	0.059558
2016-05-23	6.5455	0.8427	0.059488
2016-05-24	6.5468	0.84291	0.0599
2016-05-25	6.5693	0.84577	0.059662
2016-05-26	6.5552	0.84432	0.059597
2016-05-27	6.549	0.84331	0.059706
2016-05-30	6.5784	0.847	0.059365
2016-05-31	6.579	0.84685	0.05932
2016-06-01	6.5889	0.84789	0.059543
2016-06-02	6.5688	0.84545	0.06006
2016-06-03	6.5793	0.84678	0.060431
2016-06-06	6.5497	0.84316	0.061406
2016-06-07	6.5618	0.84476	0.061101
2016-06-08	6.5593	0.84458	0.061207
2016-06-13	6.5805	0.84767	0.061817
2016-06-14	6.5791	0.84751	0.061851
2016-06-15	6.6001	0.85036	0.062298
2016-06-16	6.5739	0.84715	0.062177
2016-06-17	6.5795	0.84799	0.062913
2016-06-20	6.5708	0.84679	0.062811
2016-06-21	6.5656	0.84606	0.063223
2016-06-22	6.5935	0.84981	0.062949
2016-06-23	6.5658	0.84636	0.0627
2016-06-24	6.5776	0.84791	0.062725
2016-06-27	6.6375	0.85522	0.065042
2016-06-28	6.6528	0.85736	0.0653
2016-06-29	6.6324	0.85482	0.064678
2016-06-30	6.6312	0.85467	0.064491
2016-07-01	6.6496	0.857	0.064457
2016-07-04	6.6472	0.85682	0.064813
2016-07-05	6.6594	0.85836	0.064986
2016-07-06	6.6857	0.86169	0.066022
2016-07-07	6.682	0.86131	0.06614
2016-07-08	6.6853	0.8617	0.066345
2016-07-11	6.6843	0.86161	0.06635
2016-07-12	6.695	0.86295	0.065318
2016-07-13	6.6891	0.8622	0.063882
2016-07-14	6.6846	0.86182	0.064217
2016-07-15	6.6805	0.86156	0.063475
2016-07-18	6.6961	0.86353	0.063464
2016-07-19	6.6971	0.8636	0.063126
2016-07-20	6.6946	0.86319	0.063183
2016-07-21	6.6872	0.86222	0.062376
2016-07-22	6.6669	0.85959	0.063014
2016-07-25	6.686	0.86193	0.062854
2016-07-26	6.6778	0.86088	0.063285
2016-07-27	6.6671	0.85952	0.063585
2016-07-28	6.6597	0.8586	0.063396
2016-07-29	6.6511	0.85751	0.063554
2016-08-01	6.6277	0.85432	0.064716
2016-08-02	6.6451	0.85629	0.064925
2016-08-03	6.6195	0.853	0.065474
2016-08-04	6.6444	0.85635	0.065593
2016-08-05	6.6406	0.85618	0.0656
2016-08-08	6.6615	0.85897	0.065217
2016-08-09	6.6594	0.85852	0.065057
2016-08-10	6.653	0.8577	0.065352
2016-08-11	6.6255	0.85418	0.065513
2016-08-12	6.6543	0.85793	0.06526
2016-08-15	6.643	0.85653	0.065571
2016-08-16	6.6305	0.85485	0.065522
2016-08-17	6.6056	0.85185	0.0658
2016-08-18	6.6273	0.85465	0.066401
2016-08-19	6.6211	0.85398	0.066094
2016-08-22	6.6652	0.85962	0.066269
2016-08-23	6.6586	0.85878	0.066404
2016-08-24	6.642	0.85666	0.066206
2016-08-25	6.6602	0.85895	0.066272
2016-08-26	6.6488	0.85736	0.066138
2016-08-29	6.6856	0.86191	0.065575
2016-08-30	6.6812	0.86146	0.065557
2016-08-31	6.6908	0.8625	0.065035
2016-09-01	6.6784	0.86097	0.064678
2016-09-02	6.6727	0.86019	0.064644
2016-09-05	6.6873	0.86225	0.064345
2016-09-06	6.6676	0.8598	0.06445
2016-09-07	6.6555	0.85823	0.065384
2016-09-08	6.662	0.85899	0.065485
2016-09-09	6.6684	0.85963	0.065181
2016-09-12	6.6908	0.86256	0.065321
2016-09-13	6.6726	0.8601	0.065549
2016-09-14	6.6895	0.86223	0.065279
2016-09-19	6.6786	0.86083	0.065286
2016-09-20	6.6595	0.85844	0.0654
2016-09-21	6.6738	0.86035	0.065666
2016-09-22	6.6513	0.85766	0.066361
2016-09-23	6.667	0.85962	0.066114
2016-09-26	6.6744	0.86053	0.066155
2016-09-27	6.6646	0.85934	0.0664
2016-09-28	6.6681	0.85987	0.066421
2016-09-29	6.67	0.86023	0.066057
2016-09-30	6.6778	0.86097	0.066012
2016-10-10	6.7008	0.86372	0.064964
2016-10-11	6.7098	0.86483	0.06474
2016-10-12	6.7258	0.86688	0.065096
2016-10-13	6.7296	0.86747	0.064521
2016-10-14	6.7157	0.86573	0.064788
2016-10-17	6.7379	0.86847	0.064723
2016-10-18	6.7303	0.86749	0.064844
2016-10-19	6.7326	0.86771	0.064856
2016-10-20	6.7311	0.86763	0.065068
2016-10-21	6.7558	0.87077	0.064885
2016-10-24	6.769	0.87253	0.065137
2016-10-25	6.7744	0.8733	0.064922
2016-10-26	6.7705	0.87289	0.065026
2016-10-27	6.7736	0.87326	0.064751
2016-10-28	6.7858	0.87506	0.064518
2016-10-31	6.7641	0.87225	0.064631
2016-11-01	6.7734	0.87343	0.06462
2016-11-02	6.7562	0.87113	0.064941
2016-11-03	6.7491	0.87028	0.06528
2016-11-04	6.7514	0.87056	0.06553
2016-11-07	6.7725	0.87318	0.065064
2016-11-08	6.7817	0.87443	0.0649
2016-11-09	6.7832	0.8747	0.0646
2016-11-10	6.7885	0.87535	0.064245
2016-11-11	6.8115	0.87821	0.063718
2016-11-14	6.8291	0.8802	0.063835
2016-11-15	6.8495	0.88297	0.063424
2016-11-16	6.8592	0.88426	0.062905
2016-11-17	6.8692	0.8855	0.063206
2016-11-18	6.8796	0.88688	0.062519
2016-11-21	6.8985	0.88932	0.062207
2016-11-22	6.8779	0.8868	0.062151
2016-11-23	6.8904	0.88843	0.062037
2016-11-24	6.9085	0.8907	0.061395
2016-11-25	6.9168	0.89179	0.061058
2016-11-28	6.9042	0.89015	0.061283
2016-11-29	6.8889	0.88822	0.061614
2016-11-30	6.8865	0.88794	0.061316
2016-12-01	6.8958	0.8891	0.060351
2016-12-02	6.8794	0.88701	0.060373
2016-12-05	6.887	0.88799	0.060792
2016-12-06	6.8575	0.88425	0.060316
2016-12-07	6.8808	0.88722	0.060384
2016-12-08	6.8731	0.88612	0.060453
2016-12-09	6.8972	0.88923	0.060433
2016-12-12	6.9086	0.89032	0.059906
2016-12-13	6.8934	0.88851	0.059999
2016-12-14	6.9028	0.88989	0.059962
2016-12-15	6.9289	0.89315	0.059068
2016-12-16	6.9508	0.89577	0.058809
2016-12-19	6.9312	0.89256	0.059051
2016-12-20	6.9468	0.89441	0.059366
2016-12-21	6.9489	0.89477	0.059014
2016-12-22	6.9435	0.89471	0.059085
2016-12-23	6.9463	0.89495	0.059126
2016-12-26	6.9459	0.89512	0.05924
2016-12-27	6.9462	0.89512	0.059265
2016-12-28	6.9495	0.8956	0.059179
2016-12-29	6.9497	0.89583	0.059463
2016-12-30	6.937	0.89451	0.059591
2017-01-03	6.9498	0.89586	0.059305
2017-01-04	6.9526	0.89638	0.059193
2017-01-05	6.9307	0.89375	0.059192
2017-01-06	6.8668	0.88552	0.059508
2017-01-09	6.9262	0.89308	0.059208
2017-01-10	6.9234	0.89268	0.059693
2017-01-11	6.9235	0.8928	0.059768
2017-01-12	6.9141	0.89159	0.060038
2017-01-13	6.8909	0.8886	0.060003
2017-01-16	6.8874	0.88812	0.060333
2017-01-17	6.8992	0.88961	0.060549
2017-01-18	6.8525	0.88356	0.060702
2017-01-19	6.8568	0.88402	0.059809
2017-01-20	6.8693	0.88552	0.059805
2017-01-23	6.8572	0.88391	0.060209
2017-01-24	6.8331	0.88093	0.060689
2017-01-25	6.8596	0.8843	0.060297
2017-01-26	6.8588	0.88415	0.060596
2017-02-03	6.8556	0.88354	0.060781
2017-02-06	6.8606	0.88433	0.061
2017-02-07	6.8604	0.88434	0.06139
2017-02-08	6.8849	0.88738	0.061372
2017-02-09	6.871	0.88552	0.061399
2017-02-10	6.8819	0.88707	0.060674
2017-02-13	6.8898	0.88806	0.06045
2017-02-14	6.8806	0.8867	0.060514
2017-02-15	6.8632	0.88452	0.06002
2017-02-16	6.8629	0.88431	0.060105
2017-02-17	6.8456	0.8822	0.060423
2017-02-20	6.8743	0.88573	0.060908
2017-02-21	6.879	0.88635	0.060757
2017-02-22	6.883	0.88686	0.060566
2017-02-23	6.8695	0.88515	0.060632
2017-02-24	6.8655	0.8848	0.060896
2017-02-27	6.8814	0.88668	0.061307
2017-02-28	6.875	0.8858	0.060986
2017-03-01	6.8798	0.88629	0.060913
2017-03-02	6.8809	0.88638	0.060381
2017-03-03	6.8896	0.88758	0.060253
2017-03-06	6.879	0.88602	0.060402
2017-03-07	6.8957	0.88813	0.060578
2017-03-08	6.9032	0.88908	0.060571
2017-03-09	6.9125	0.89001	0.060436
2017-03-10	6.9123	0.89011	0.060042
2017-03-13	6.8988	0.88852	0.060087
2017-03-14	6.9118	0.8901	0.060164
2017-03-15	6.9115	0.88968	0.06028
2017-03-16	6.8862	0.88668	0.060738
2017-03-17	6.8873	0.88737	0.060772
2017-03-20	6.8998	0.88883	0.06126
2017-03-21	6.9071	0.88941	0.06139
2017-03-22	6.8889	0.88704	0.061728
2017-03-23	6.8856	0.8865	0.061869
2017-03-24	6.8845	0.88632	0.061999
2017-03-27	6.8701	0.88456	0.062172
2017-03-28	6.8782	0.88548	0.062149
2017-03-29	6.8915	0.88718	0.062051
2017-03-30	6.8889	0.88668	0.061996
2017-03-31	6.8993	0.88779	0.061766
2017-04-05	6.8906	0.88671	0.062221
2017-04-06	6.893	0.88722	0.062458
2017-04-07	6.8949	0.8874	0.062252
2017-04-10	6.9042	0.8887	0.062119
2017-04-11	6.8957	0.88744	0.062264
2017-04-12	6.894	0.88717	0.062843
2017-04-13	6.8651	0.88339	0.063106
2017-04-14	6.874	0.88425	0.063136
2017-04-17	6.8785	0.88485	0.063491
2017-04-18	6.8849	0.88576	0.063152
2017-04-19	6.8664	0.88326	0.063297
2017-04-20	6.8792	0.88486	0.063295
2017-04-21	6.8823	0.88518	0.063007
2017-04-24	6.8673	0.88316	0.062433
2017-04-25	6.8833	0.88478	0.062746
2017-04-26	6.8862	0.88668	0.060738
2017-04-27	6.8896	0.88546	0.061977
2017-04-28	6.8931	0.88584	0.062023
2017-05-02	6.8956	0.88653	0.061677
2017-05-03	6.8892	0.88538	0.061538
2017-05-04	6.8957	0.88621	0.061208
2017-05-05	6.8884	0.88507	0.061215
2017-05-08	6.8947	0.88582	0.061159
2017-05-09	6.9037	0.88681	0.061063
2017-05-10	6.9066	0.88726	0.060755
2017-05-11	6.9051	0.88676	0.060452
2017-05-12	6.8948	0.88507	0.060657
2017-05-15	6.8852	0.88338	0.060827
2017-05-16	6.879	0.88329	0.060622
2017-05-17	6.8635	0.88127	0.061041
2017-05-18	6.8612	0.8813	0.061903
2017-05-19	6.8786	0.88379	0.061927
2017-05-22	6.8673	0.88224	0.061816
2017-05-23	6.8661	0.8819	0.061947
2017-05-24	6.8758	0.88291	0.061654
2017-05-25	6.8695	0.88203	0.061637
2017-05-26	6.8698	0.88171	0.061527
2017-05-27	6.8698	0.88171	0.061527
2017-05-31	6.8633	0.88075	0.061995
2017-06-01	6.809	0.87391	0.061526
2017-06-02	6.807	0.87365	0.061103
2017-06-05	6.7935	0.87208	0.061522
2017-06-06	6.7934	0.87178	0.061542
2017-06-07	6.7858	0.87059	0.062015
2017-06-08	6.793	0.87142	0.061849
2017-06-09	6.7971	0.87172	0.061853
2017-06-12	6.7948	0.8715	0.061615
2017-06-13	6.7954	0.87129	0.06182
2017-06-14	6.7939	0.87119	0.061716
2017-06-15	6.7852	0.8701	0.062017
2017-06-16	6.7995	0.87151	0.061289
2017-06-19	6.7972	0.87148	0.061285
2017-06-20	6.8096	0.87315	0.061
2017-06-21	6.8193	0.87422	0.061285
2017-06-22	6.8197	0.8743	0.061287
2017-06-23	6.8238	0.87496	0.061329
2017-06-26	6.822	0.87472	0.061323
2017-06-27	6.8292	0.87565	0.061044
2017-06-28	6.8053	0.87244	0.060692
2017-06-29	6.794	0.87065	0.060476
2017-06-30	6.7744	0.86792	0.060485
2017-07-03	6.7772	0.86813	0.060352
2017-07-04	6.7889	0.86894	0.05992
2017-07-05	6.7922	0.86994	0.060104
2017-07-06	6.7953	0.87044	0.060062
2017-07-07	6.7914	0.86949	0.060015
2017-07-10	6.7964	0.87007	0.05963
2017-07-11	6.7983	0.87014	0.059585
2017-07-12	6.7868	0.86874	0.059666
2017-07-13	6.7802	0.8682	0.059821
2017-07-14	6.7774	0.86787	0.05977
2017-07-17	6.7562	0.86557	0.060071
2017-07-18	6.7611	0.86643	0.060052
2017-07-19	6.7451	0.86424	0.060225
2017-07-20	6.7464	0.86406	0.06033
2017-07-21	6.7415	0.86317	0.060252
2017-07-24	6.741	0.86326	0.060743
2017-07-25	6.7485	0.86442	0.06065
2017-07-26	6.7529	0.86479	0.060306
2017-07-27	6.7307	0.86189	0.06059
2017-07-28	6.7373	0.86279	0.060625
2017-07-31	6.7283	0.86158	0.060879
2017-08-01	6.7148	0.85974	0.060849
2017-08-02	6.7205	0.8601	0.060869
2017-08-03	6.7211	0.85985	0.060682
2017-08-04	6.7132	0.85869	0.061081
2017-08-07	6.7228	0.85982	0.060679
2017-08-08	6.7184	0.859	0.06066
2017-08-09	6.7075	0.8572	0.060938
2017-08-10	6.677	0.8544	0.060705
2017-08-11	6.6642	0.85236	0.061015
2017-08-14	6.6601	0.85181	0.060952
2017-08-15	6.6689	0.85267	0.060714
2017-08-16	6.6779	0.85358	0.060358
2017-08-17	6.6709	0.85292	0.060634
2017-08-18	6.6744	0.85315	0.060975
2017-08-21	6.6709	0.85275	0.061014
2017-08-22	6.6597	0.85117	0.061087
2017-08-23	6.6633	0.85139	0.060755
2017-08-24	6.6525	0.85014	0.061072
2017-08-25	6.6579	0.85092	0.060774
2017-08-28	6.6353	0.84823	0.060725
2017-08-29	6.6293	0.84735	0.060961
2017-08-30	6.6102	0.84474	0.060248
2017-08-31	6.601	0.84358	0.05978
2017-09-01	6.5909	0.84226	0.059845
2017-09-04	6.5668	0.8392	0.059767
2017-09-05	6.537	0.8354	0.059442
2017-09-06	6.5311	0.83461	0.060119
2017-09-07	6.5269	0.83413	0.059762
2017-09-08	6.5032	0.83337	0.05984
2017-09-11	6.4997	0.83182	0.059733
2017-09-12	6.5277	0.83545	0.059661
2017-09-13	6.5382	0.83687	0.059316
2017-09-14	6.5465	0.83791	0.059238
2017-09-15	6.5423	0.83741	0.059474
2017-09-18	6.5419	0.8368	0.058896
2017-09-19	6.553	0.83838	0.058822
2017-09-20	6.567	0.84144	0.058923
2017-09-21	6.5867	0.84429	0.058538
2017-09-22	6.5861	0.84371	0.058569
2017-09-25	6.5945	0.84449	0.058665
2017-09-26	6.6076	0.84563	0.059184
2017-09-27	6.6192	0.84727	0.059008
2017-09-28	6.6285	0.8489	0.058813
2017-09-29	6.6369	0.84966	0.059089
2017-10-09	6.6493	0.85184	0.059145
2017-10-10	6.6273	0.84911	0.058809
2017-10-11	6.5841	0.84374	0.058596
2017-10-12	6.5808	0.8431	0.058527
2017-10-13	6.5866	0.84365	0.058695
2017-10-16	6.5839	0.84343	0.058817
2017-10-17	6.5883	0.84375	0.058739
2017-10-18	6.5991	0.8452	0.05888
2017-10-19	6.6093	0.8464	0.058519
2017-10-20	6.6092	0.84725	0.058707
2017-10-23	6.6205	0.84855	0.058149
2017-10-24	6.6268	0.84961	0.058442
2017-10-25	6.6322	0.85009	0.058234
2017-10-26	6.6288	0.84951	0.058362
2017-10-27	6.6473	0.8519	0.058282
2017-10-30	6.6487	0.85199	0.058455
2017-10-31	6.6397	0.85128	0.0587
2017-11-01	6.63	0.84985	0.058324
2017-11-02	6.6196	0.84851	0.058016
2017-11-03	6.6072	0.84687	0.057947
2017-11-06	6.6247	0.84903	0.058022
2017-11-07	6.6216	0.84873	0.058199
2017-11-08	6.6277	0.84931	0.058283
2017-11-09	6.6325	0.85082	0.058243
2017-11-10	6.6282	0.84986	0.058484
2017-11-13	6.6347	0.85031	0.058376
2017-11-14	6.6399	0.85117	0.058432
2017-11-15	6.6263	0.84914	0.058455
2017-11-16	6.6286	0.84902	0.058738
2017-11-17	6.6277	0.84868	0.058603
2017-11-20	6.6271	0.84832	0.05912
2017-11-21	6.6356	0.8495	0.058936
2017-11-22	6.629	0.84868	0.058993
2017-11-23	6.6021	0.84519	0.059351
2017-11-24	6.581	0.84265	0.059137
2017-11-27	6.5874	0.84377	0.059026
2017-11-28	6.5944	0.84525	0.059364
2017-11-29	6.6011	0.84599	0.059154
2017-11-30	6.6034	0.84577	0.058945
2017-12-01	6.6067	0.84588	0.058682
2017-12-04	6.6105	0.84617	0.058628
2017-12-05	6.6105	0.84617	0.058628
2017-12-06	6.6163	0.84666	0.058782
2017-12-07	6.6195	0.84727	0.058947
2017-12-08	6.6218	0.848	0.058498
2017-12-11	6.6152	0.84721	0.05826
2017-12-12	6.6162	0.84733	0.058267
2017-12-13	6.6251	0.84866	0.058338
2017-12-14	6.6033	0.84608	0.058579
2017-12-15	6.6113	0.84648	0.058837
2017-12-18	6.6162	0.84691	0.058713
2017-12-19	6.6098	0.84691	0.058713
2017-12-20	6.6066	0.84501	0.058513
2017-12-21	6.5795	0.84116	0.058056
2017-12-22	6.5821	0.8415	0.058069
2017-12-25	6.5683	0.84002	0.057975
2017-12-26	6.5416	0.83745	0.057734
2017-12-27	6.5421	0.83734	0.057795
2017-12-28	6.5412	0.83733	0.057788
2017-12-29	6.5342	0.83591	0.057883
2018-01-02	6.5079	0.83231	0.05773
2018-01-03	6.492	0.83058	0.057849
2018-01-04	6.5043	0.832	0.057748
2018-01-05	6.4915	0.83031	0.057565
2018-01-08	6.4832	0.82913	0.057308
2018-01-09	6.4968	0.83054	0.057409
2018-01-10	6.5207	0.83378	0.057863
2018-01-11	6.5147	0.83274	0.05851
2018-01-12	6.4932	0.82997	0.058375
2018-01-15	6.4574	0.82543	0.058145
2018-01-16	6.4372	0.82272	0.058193
2018-01-17	6.4335	0.82226	0.058293
2018-01-18	6.4401	0.82399	0.057854
2018-01-19	6.4169	0.82067	0.057812
2018-01-22	6.4112	0.82013	0.057888
2018-01-23	6.4009	0.81861	0.05768
2018-01-24	6.3916	0.81749	0.057979
2018-01-25	6.3724	0.81514	0.05832
2018-01-26	6.3436	0.81145	0.057881
2018-01-29	6.3267	0.80923	0.058212
2018-01-30	6.3312	0.80986	0.0581
2018-01-31	6.3339	0.80993	0.058216
2018-02-01	6.3045	0.806	0.057667
2018-02-02	6.2885	0.80413	0.057452
2018-02-05	6.3019	0.80572	0.057215
2018-02-06	6.3072	0.8065	0.05772
2018-02-07	6.2882	0.80419	0.057323
2018-02-08	6.2822	0.80359	0.057446
2018-02-09	6.3194	0.80815	0.058192
2018-02-12	6.3001	0.8057	0.057935
2018-02-13	6.3247	0.80876	0.058159
2018-02-14	6.3428	0.81094	0.05885
2018-02-22	6.353	0.8119	0.05904
2018-02-23	6.3482	0.81139	0.059465
2018-02-26	6.3378	0.81009	0.059225
2018-02-27	6.3146	0.80714	0.058963
2018-02-28	6.3294	0.80858	0.058872
2018-03-01	6.3352	0.80939	0.059413
2018-03-02	6.3334	0.80913	0.059655
2018-03-05	6.3431	0.80992	0.060088
2018-03-06	6.3386	0.80934	0.059651
2018-03-07	6.3294	0.80802	0.059931
2018-03-08	6.3239	0.80718	0.059602
2018-03-09	6.3451	0.80923	0.059641
2018-03-12	6.3333	0.80795	0.059244
2018-03-13	6.3218	0.80635	0.059459
2018-03-14	6.3205	0.80611	0.059352
2018-03-15	6.3141	0.80532	0.059446
2018-03-16	6.334	0.80772	0.059589
2018-03-19	6.332	0.80731	0.059751
2018-03-20	6.3246	0.80636	0.059672
2018-03-21	6.3396	0.80809	0.059519
2018-03-22	6.3167	0.80509	0.059626
2018-03-23	6.3272	0.80621	0.060361
2018-03-26	6.3193	0.8052	0.060297
2018-03-27	6.2816	0.80047	0.05954
2018-03-28	6.2785	0.80019	0.059559
2018-03-29	6.3046	0.80349	0.059011
2018-03-30	6.2881	0.80125	0.059066
2018-04-02	6.2764	0.79969	0.059047
2018-04-03	6.2833	0.80058	0.059395
2018-04-04	6.2926	0.80174	0.059075
2018-04-09	6.3114	0.80414	0.059014
2018-04-10	6.3071	0.80352	0.059104
2018-04-11	6.2911	0.80145	0.058697
2018-04-12	6.2834	0.80048	0.058808
2018-04-13	6.2898	0.80126	0.058617
2018-04-16	6.2884	0.80107	0.058487
2018-04-17	6.2771	0.79965	0.058578
2018-04-18	6.2817	0.80023	0.058661
2018-04-19	6.2832	0.80047	0.058557
2018-04-20	6.2897	0.80142	0.05853
2018-04-23	6.3034	0.80349	0.058456
2018-04-24	6.3229	0.80615	0.058095
2018-04-25	6.3066	0.80372	0.057936
2018-04-26	6.3283	0.80648	0.057823
2018-04-27	6.3393	0.80785	0.057967
2018-05-02	6.367	0.81114	0.057917
2018-05-03	6.3732	0.81198	0.058025
2018-05-04	6.3521	0.80924	0.058189
2018-05-07	6.3584	0.81005	0.058258
2018-05-08	6.3674	0.81116	0.058386
2018-05-09	6.3733	0.81192	0.058423
2018-05-10	6.3768	0.81238	0.058071
2018-05-11	6.3524	0.80925	0.05802
2018-05-14	6.3345	0.80695	0.057934
2018-05-15	6.3486	0.80877	0.057858
2018-05-16	6.3745	0.81206	0.057784
2018-05-17	6.3679	0.81124	0.057693
2018-05-18	6.3763	0.81228	0.057517
2018-05-21	6.3852	0.81342	0.057551
2018-05-22	6.3799	0.81288	0.057459
2018-05-23	6.3773	0.81242	0.057531
2018-05-24	6.3816	0.81316	0.05805
2018-05-25	6.3867	0.81386	0.05841
2018-05-28	6.3962	0.8153	0.058334
2018-05-29	6.4021	0.81605	0.058509
2018-05-30	6.4207	0.81839	0.059234
2018-05-31	6.4144	0.81754	0.058986
2018-06-01	6.4078	0.81672	0.058906
2018-06-04	6.4208	0.81838	0.058609
2018-06-05	6.4157	0.81763	0.058368
2018-06-06	6.404	0.81606	0.058281
2018-06-07	6.3919	0.81459	0.058029
2018-06-08	6.4003	0.81578	0.05836
2018-06-11	6.4064	0.81648	0.05854
2018-06-12	6.4121	0.81718	0.058079
2018-06-13	6.4156	0.81757	0.058084
2018-06-14	6.3962	0.81508	0.058007
2018-06-15	6.4306	0.81928	0.058122
2018-06-19	6.4235	0.81835	0.058203
2018-06-20	6.4586	0.82282	0.058774
2018-06-21	6.4706	0.82488	0.058613
2018-06-22	6.4804	0.82614	0.058944
2018-06-25	6.4893	0.82706	0.059078
2018-06-26	6.518	0.83057	0.059482
2018-06-27	6.5569	0.83539	0.059592
2018-06-28	6.596	0.84044	0.059966
2018-06-29	6.6166	0.8431	0.059914
2018-07-02	6.6157	0.84309	0.059777
2018-07-03	6.6497	0.84753	0.060007
2018-07-04	6.6595	0.849	0.060294
2018-07-05	6.618	0.84371	0.05991
2018-07-06	6.6336	0.84525	0.059973
2018-07-09	6.6393	0.84591	0.060111
2018-07-10	6.6259	0.8442	0.059726
2018-07-11	6.6234	0.8439	0.059733
2018-07-12	6.6726	0.85018	0.059691
2018-07-13	6.6727	0.85021	0.059234
2018-07-16	6.6758	0.85058	0.059405
2018-07-17	6.6821	0.8514	0.059471
2018-07-18	6.6914	0.85254	0.059262
2018-07-19	6.7066	0.85446	0.059466
2018-07-20	6.7671	0.86213	0.060181
2018-07-23	6.7593	0.86114	0.060813
2018-07-24	6.7891	0.86513	0.060963
2018-07-25	6.804	0.86724	0.061187
2018-07-26	6.7662	0.86249	0.061029
2018-07-27	6.7942	0.86578	0.061138
2018-07-30	6.8131	0.86812	0.061438
2018-07-31	6.8165	0.86852	0.061398
2018-08-01	6.8293	0.87009	0.061126
2018-08-02	6.7942	0.86566	0.060857
2018-08-03	6.8322	0.87042	0.061238
2018-08-06	6.8513	0.87295	0.061647
2018-08-07	6.8431	0.87182	0.061493
2018-08-08	6.8313	0.8703	0.061364
2018-08-09	6.8317	0.87037	0.061615
2018-08-10	6.8395	0.87131	0.061595
2018-08-13	6.8629	0.87428	0.06207
2018-08-14	6.8695	0.87512	0.062119
2018-08-15	6.8856	0.87716	0.06194
2018-08-16	6.8946	0.87837	0.06243
2018-08-17	6.8894	0.87767	0.062177
2018-08-20	6.8718	0.87543	0.062233
2018-08-21	6.836	0.87088	0.062218
2018-08-22	6.8271	0.86974	0.062024
2018-08-23	6.8367	0.87096	0.061838
2018-08-24	6.871	0.8753	0.061764
2018-08-27	6.8508	0.87273	0.061625
2018-08-28	6.8052	0.86692	0.061245
2018-08-29	6.8072	0.86725	0.061225
2018-08-30	6.8113	0.86784	0.060998
2018-08-31	6.8246	0.86949	0.061524
[truncated: 316 more rows]
